# Supplementary material for: β-Alanyl aminopeptidase-activated fluorogenic probes for the rapid identification of Pseudomonas aeruginosa in clinical samples
Source: Royal Society of Chemistry journal article supplement (doi:10.1039/c6ra12875k), 2016-01-01

**$\beta$ -Alanyl aminopeptidase-activated fluorogenic probes for the rapid identification of *Pseudomonas aeruginosa* in clinical samples**

Linda Váradi,<sup>a</sup> David E. Hibbs,<sup>a</sup> Sylvain Orenga,<sup>b</sup> Michèle Babolat,<sup>b</sup> John D. Perry,<sup>c</sup> and Paul W. Groundwater<sup>a†</sup>

<sup>a</sup> Faculty of Pharmacy, University of Sydney, Camperdown Campus, Sydney, NSW 2006, Australia.

<sup>b</sup> bioMérieux, R & D Microbiologie, 3 route de Port Michaud, 38 390 La Balme-les-Grottes, France.

<sup>c</sup> Microbiology Department, Freeman Hospital, High Heaton, Newcastle upon Tyne, NE7 7DN, United Kingdom.

**Supplementary Information**

|                                                                                                                                                                                             | page      |
|---------------------------------------------------------------------------------------------------------------------------------------------------------------------------------------------|-----------|
| <b>Table S1. List of microorganisms inoculated onto 96-well plate</b>                                                                                                                       | <b>2</b>  |
| <b>Figure S1 Clinically relevant Gram positive, Gram negative, and yeast microorganisms (<math>1.5 \times 10^5</math> CFU/spot) grown for 18h on an agar medium containing substrate 8b</b> | <b>3</b>  |
| <b>Figure S2 Blanks</b>                                                                                                                                                                     | <b>4</b>  |
| <b>Figure S3 <i>E. coli</i> (API 00 08 013)</b>                                                                                                                                             | <b>5</b>  |
| <b>Figure S4 <i>P. aeruginosa</i> NCTC 10662</b>                                                                                                                                            | <b>6</b>  |
| <b>Figure S5 <i>S. marcescens</i> API 04 4 009</b>                                                                                                                                          | <b>7</b>  |
| <b>Figure S6 <i>S. marcescens</i> ATCC 264</b>                                                                                                                                              | <b>8</b>  |
| <b>Figure S7 <i>S. marcescens</i> ATCC 43861</b>                                                                                                                                            | <b>9</b>  |
| <b>Figure S8 <i>P. aeruginosa</i> API 10 11 314</b>                                                                                                                                         | <b>10</b> |
| <b>Figure S9 <i>P. aeruginosa</i> ATCC 27853</b>                                                                                                                                            | <b>11</b> |
| <b>Figure S10 <i>P. aeruginosa</i> ATCC 10145</b>                                                                                                                                           | <b>12</b> |
| <b>Figure S11 <i>S. marcescens</i> API 92 11 027</b>                                                                                                                                        | <b>13</b> |
| <b>Figure S12 <i>P. aeruginosa</i> API 08 04 064</b>                                                                                                                                        | <b>14</b> |
| <b>Figure S13 <i>P. aeruginosa</i> API 14 02 100</b>                                                                                                                                        | <b>15</b> |
| <b>Figure S14 <i>P. aeruginosa</i> API 14 02 103</b>                                                                                                                                        | <b>16</b> |
| <b>NMR Spectra</b>                                                                                                                                                                          | <b>17</b> |
| <b>4-(Boc-<math>\beta</math>-Alanyl-amino)benzyl alcohol 5 <math>^1\text{H}</math> NMR</b>                                                                                                  | <b>17</b> |
| <b>4-(Boc-<math>\beta</math>-Alanyl-amino)benzyl alcohol 5 <math>^{13}\text{C}</math> NMR</b>                                                                                               | <b>18</b> |
| <b>7-{4-(Boc-<math>\beta</math>-Alanyl-amino)}benzyloxy-4-methylcoumarin 7a <math>^1\text{H}</math> NMR</b>                                                                                 | <b>19</b> |
| <b>7-{4-(Boc-<math>\beta</math>-Alanyl-amino)}benzyloxy-4-methylcoumarin 7a <math>^{13}\text{C}</math> NMR</b>                                                                              | <b>20</b> |
| <b>7-{4-(Boc-<math>\beta</math>-Alanyl-amino)}benzyloxy-3-ethoxycarbonylcoumarin 7b <math>^1\text{H}</math> NMR</b>                                                                         | <b>21</b> |
| <b>7-{4-(Boc-<math>\beta</math>-Alanyl-amino)}benzyloxy-3-ethoxycarbonylcoumarin 7b <math>^{13}\text{C}</math> NMR</b>                                                                      | <b>22</b> |
| <b>7-{4-(<math>\beta</math>-Alanyl-amino)}benzyloxy-4-methylcoumarin trifluoroacetate 8a <math>^1\text{H}</math> NMR</b>                                                                    | <b>23</b> |
| <b>7-{4-(<math>\beta</math>-Alanyl-amino)}benzyloxy-4-methylcoumarin trifluoroacetate 8a <math>^{13}\text{C}</math> NMR</b>                                                                 | <b>24</b> |
| <b>7-[4-(<math>\beta</math>-Alanyl-amino)]benzyloxy-3-ethoxycarbonylcoumarin trifluoroacetate 8b <math>^1\text{H}</math> NMR</b>                                                            | <b>25</b> |
| <b>7-[4-(<math>\beta</math>-Alanyl-amino)]benzyloxy-3-ethoxycarbonylcoumarin trifluoroacetate 8b <math>^{13}\text{C}</math> NMR</b>                                                         | <b>26</b> |

**Table S1.** List of microorganisms inoculated onto 96-well plate for the evaluation of **8a,b** and **9**

| <b>Species</b>       | <b>bioMérieux strains collection number</b> | <b>ATCC / NCTC reference number</b> |
|----------------------|---------------------------------------------|-------------------------------------|
| <i>E. coli</i>       | API 00 08 013                               |                                     |
| <i>P. aeruginosa</i> | API 77 05 034                               | NCTC 10662                          |
| <i>S. marcescens</i> | API 04 04 009                               |                                     |
| <i>S. marcescens</i> | API 75 08 042                               | ATCC 264                            |
| <i>S. marcescens</i> | API 95 05 151                               | ATCC 43861                          |
| <i>P. aeruginosa</i> | API 10 11 314                               |                                     |
| <i>P. aeruginosa</i> | API 14 02 224                               | ATCC 27853                          |
| <i>P. aeruginosa</i> | API 10 06 028                               | ATCC 10145                          |
| <i>S. marcescens</i> | API 92 11 027                               |                                     |
| <i>P. aeruginosa</i> | API 08 04 064                               |                                     |
| <i>P. aeruginosa</i> | API 14 02 100                               |                                     |
| <i>P. aeruginosa</i> | API 14 02 103                               |                                     |

\*:API xx xx xxx = bioMérieux strains collection number

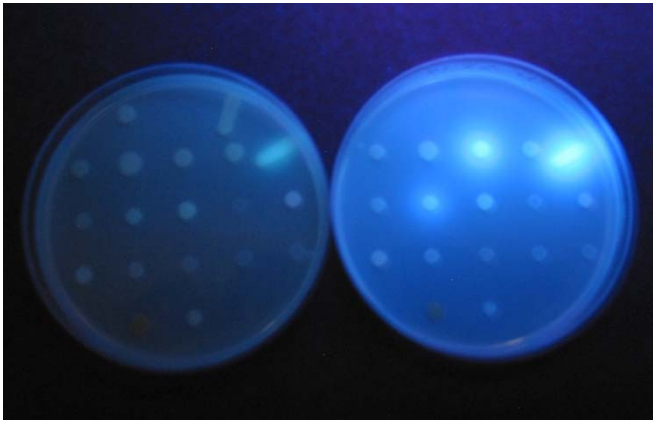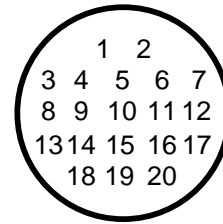

- |    |                                      |    |                                  |
|----|--------------------------------------|----|----------------------------------|
| 1  | <i>Escherichia coli</i>              | 11 | <i>Streptococcus pyogenes</i>    |
| 2  | <i>Klebsiella pneumoniae</i>         | 12 | MRSA                             |
| 3  | <i>Providencia rettgeri</i>          | 13 | <i>Staphylococcus aureus</i>     |
| 4  | <i>Enterobacter cloacae</i>          | 14 | <i>Streptococcus epidermidis</i> |
| 5  | <b><i>Serratia marcescens</i></b>    | 15 | <i>Listeria monocytogenes</i>    |
| 6  | <i>Salmonella typhimurium</i>        | 16 | <i>Enterococcus faecium</i>      |
| 7  | <b><i>Pseudomonas aeruginosa</i></b> | 17 | <i>Enterococcus faecalis</i>     |
| 8  | <i>Yersinia enterocolitica</i>       | 18 | <i>Bacillus subtilis</i>         |
| 9  | <b><i>Burkholderia cepacia</i></b>   | 19 | <i>Candida albicans</i>          |
| 10 | <i>Acinetobacter baumannii</i>       | 20 | <i>Candida glabrata</i>          |

**Figure S1.** Clinically relevant Gram positive, Gram negative, and yeast microorganisms ( $1.5 \times 10^5$  CFU/spot) grown for 18h on an agar medium containing substrate **8b**; fluorescence corresponds only to the known BAP producers, *Pseudomonas aeruginosa* (spot 7), *Burkholderia cepacia* (spot 9) and *Serratia marcescens* (spot 5)[see Table 1 for identity of spots].

**Figure S2.** Readings from wells in the absence of microorganisms containing no substrate (blue line), substrate **8a** (grey line), substrate **8b** (yellow line) or substrate **9** (orange line), respectively; **a)** absorption at 660 nm; **b)** fluorescent signal intensities at 365 / 440 nm; **c)** fluorescent intensities at 375 / 445 nm.

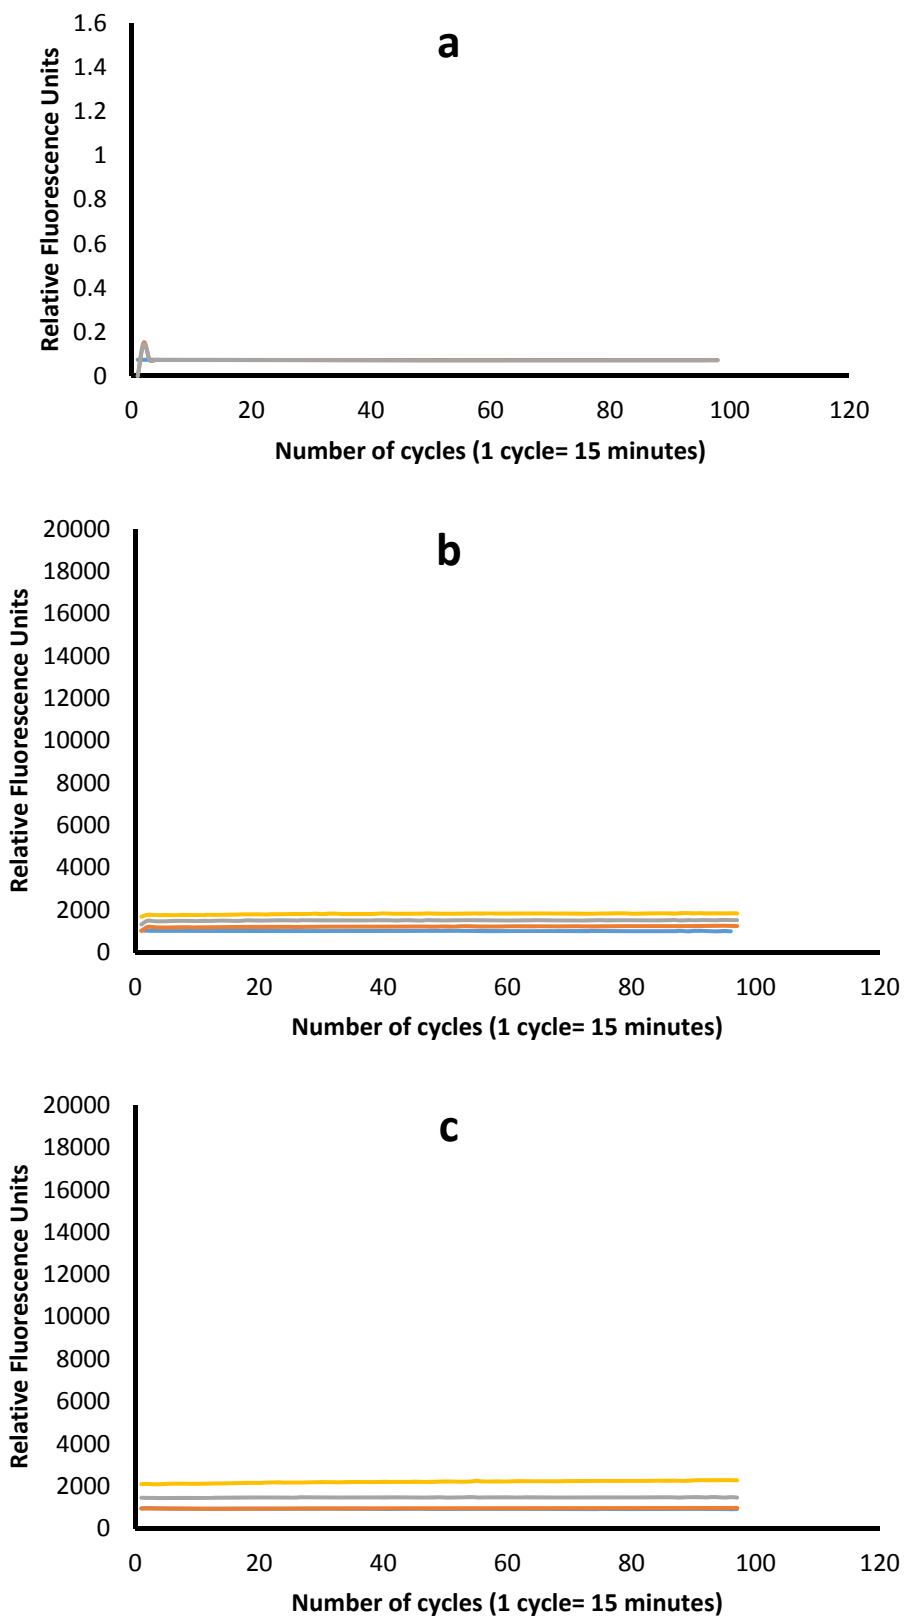

**Figure S3.** Readings from wells containing *E. coli* (API 00 08 013) in the presence of no substrate (blue line), substrate **8a** (grey line), substrate **8b** (yellow line) or substrate **9** (orange line), respectively; **a**) absorbance at 660 nm; **b**) fluorescent signal intensities at 365 / 440 nm; **c**) fluorescent intensities at 375 / 445 nm.

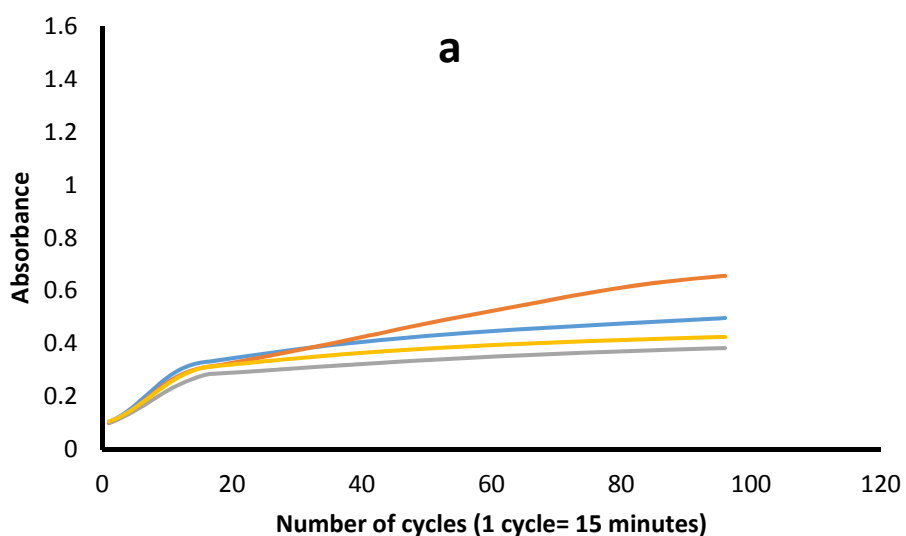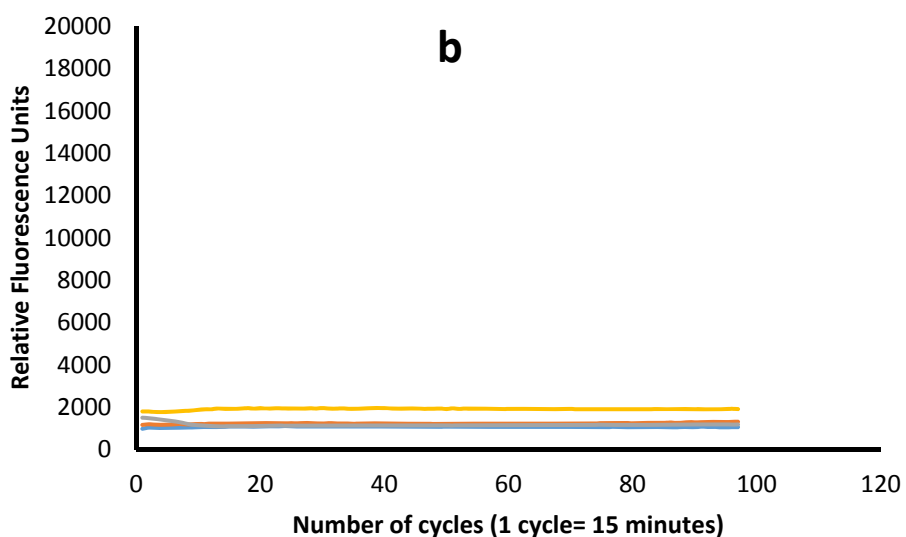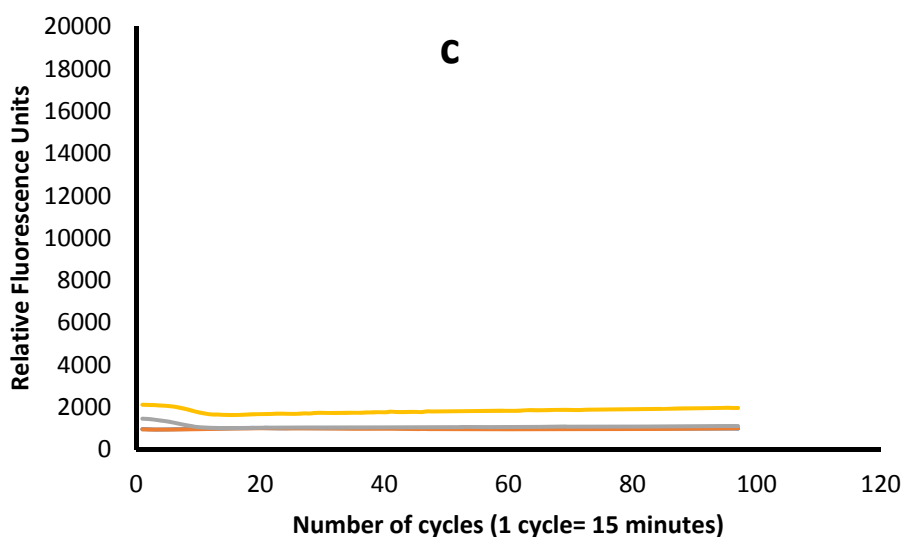

**Figure S4.** Readings from wells containing *P. aeruginosa* NCTC 10662 in the presence of no substrate (blue line), substrate **8a** (grey line), substrate **8b** (yellow line) or substrate **9** (orange line), respectively; **a**) absorbance at 660 nm; **b**) fluorescent signal intensities at 365 / 440 nm; **c**) fluorescent intensities at 375 / 445 nm.

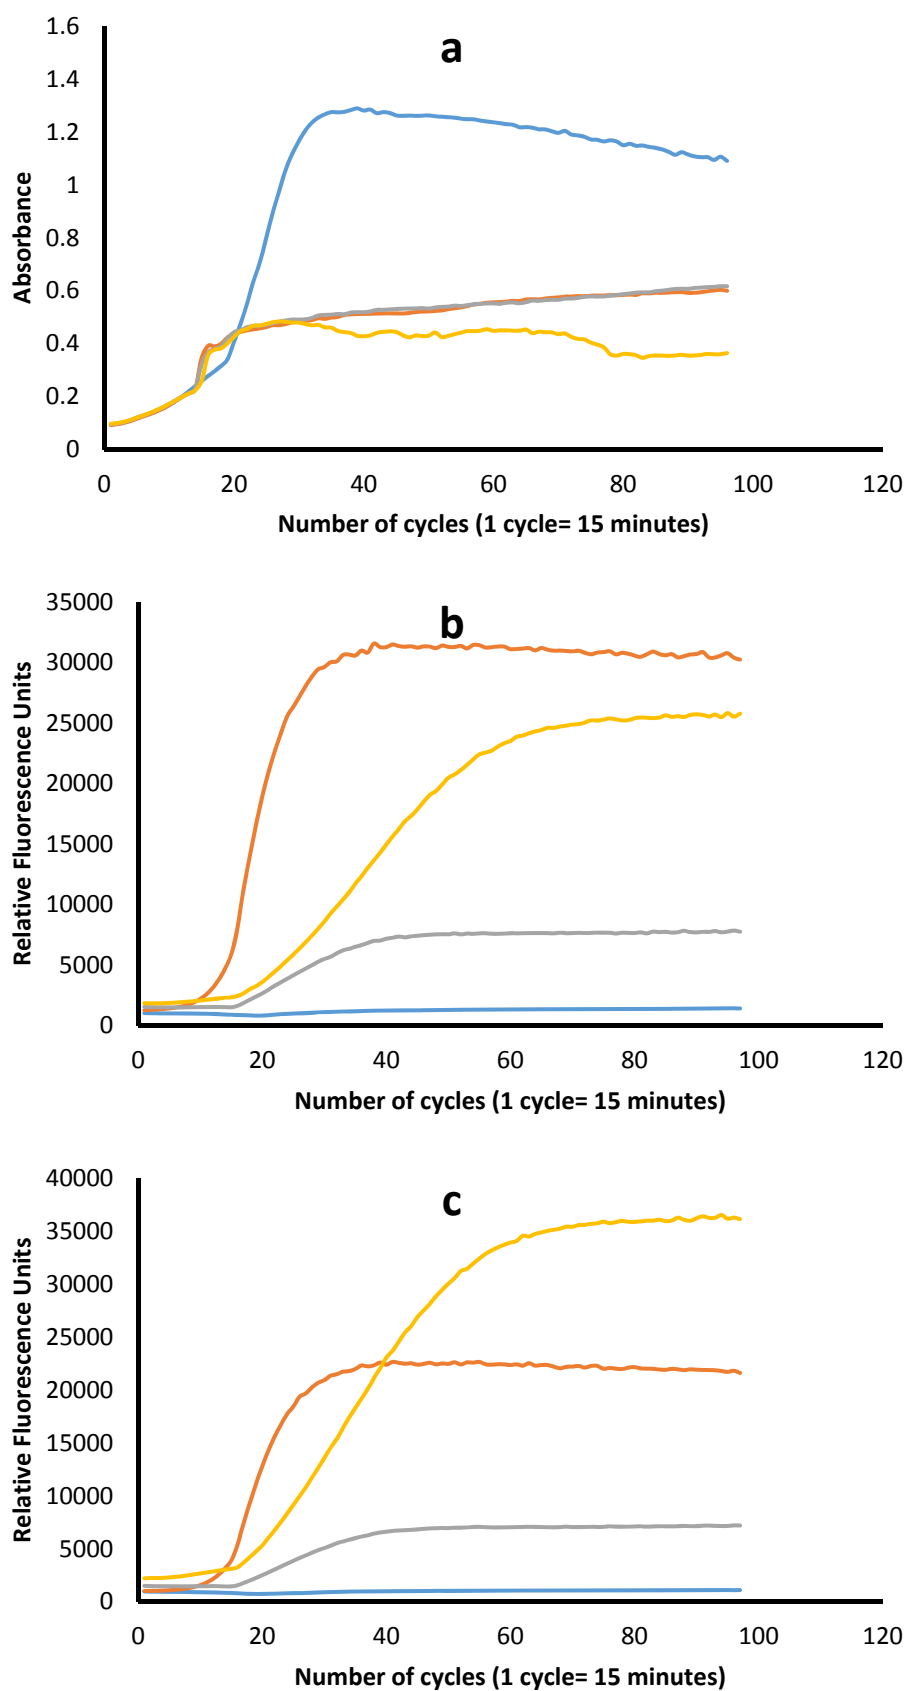

**Figure S5.** Readings from wells containing *S. marcescens* API 04 4 009 in the presence of no substrate (blue line), substrate **8a** (grey line), substrate **8b** (yellow line) or substrate **9** (orange line), respectively; **a**) absorbance at 660 nm; **b**) fluorescent signal intensities at 365 / 440 nm; **c**) fluorescent intensities at 375 / 445 nm.

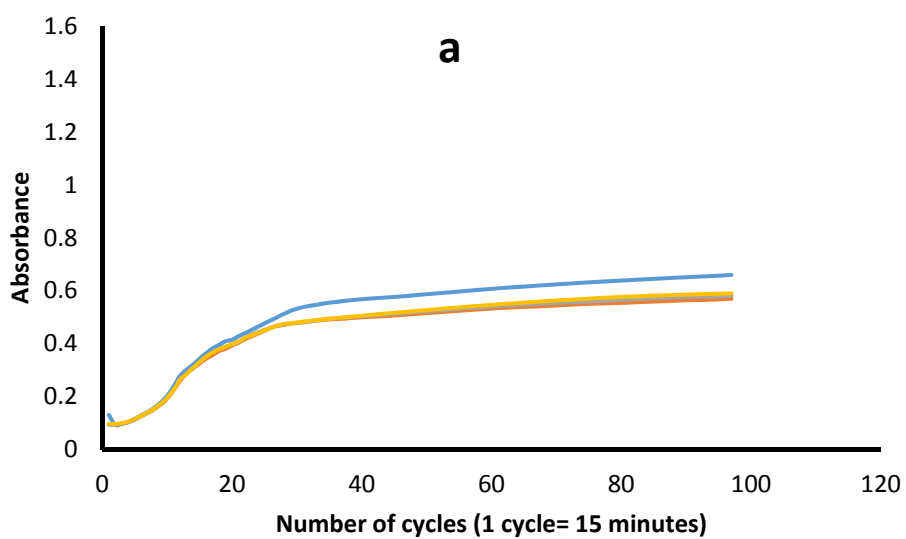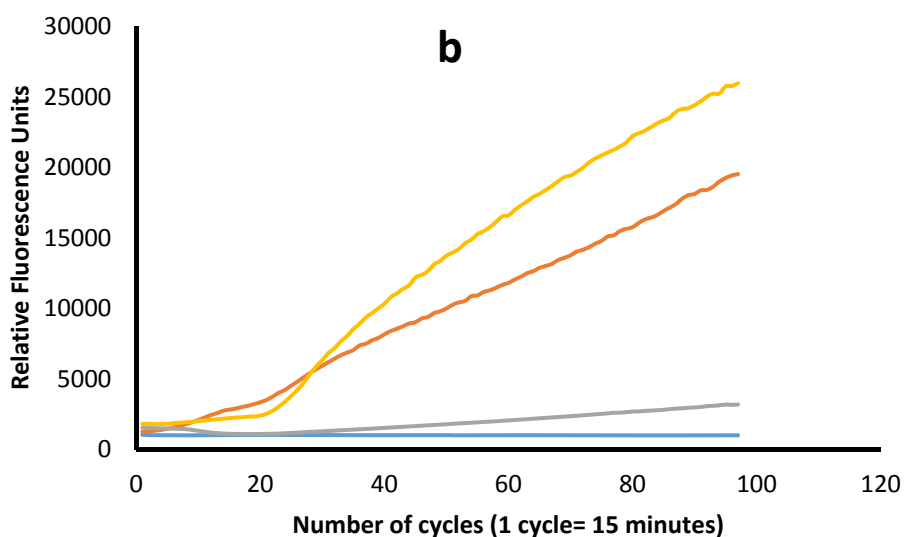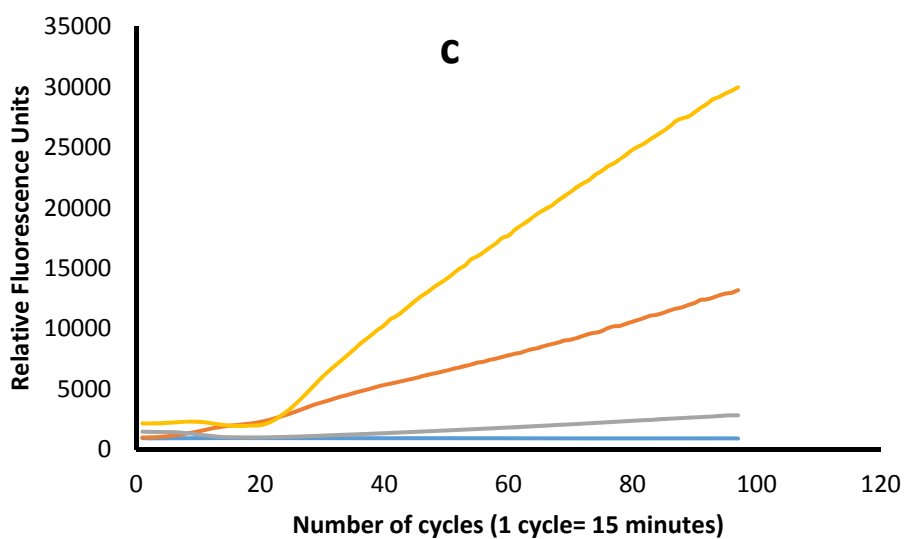

**Figure S6.** Readings from wells containing *S. marcescens* ATCC 264 in the presence of no substrate (blue line), substrate **8a** (grey line), substrate **8b** (yellow line) or substrate **9** (orange line), respectively; **a**) absorbance at 660 nm; **b**) fluorescent signal intensities at 365 / 440 nm; **c**) fluorescent intensities at 375 / 445 nm.

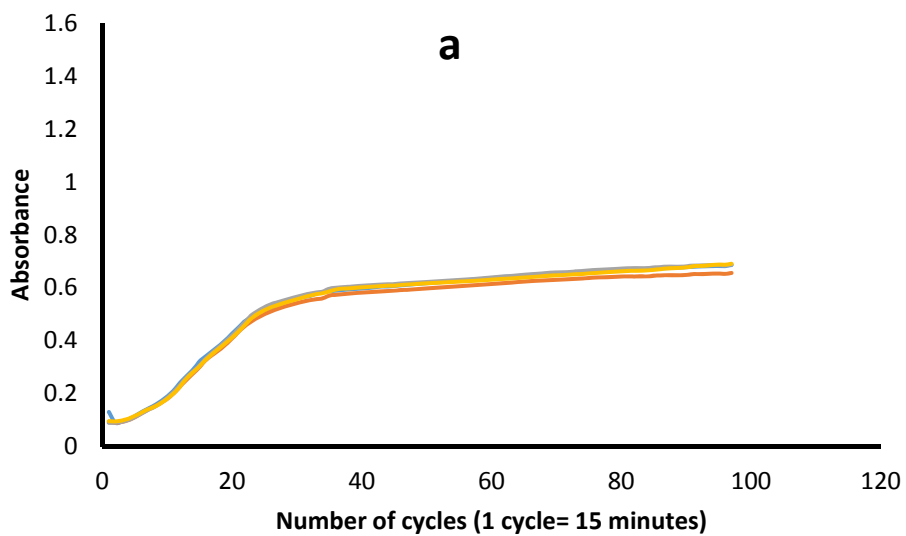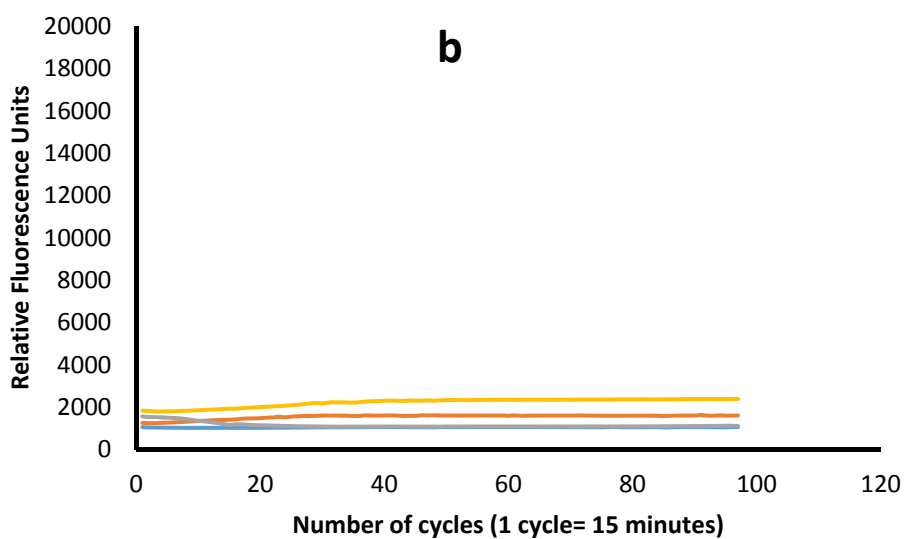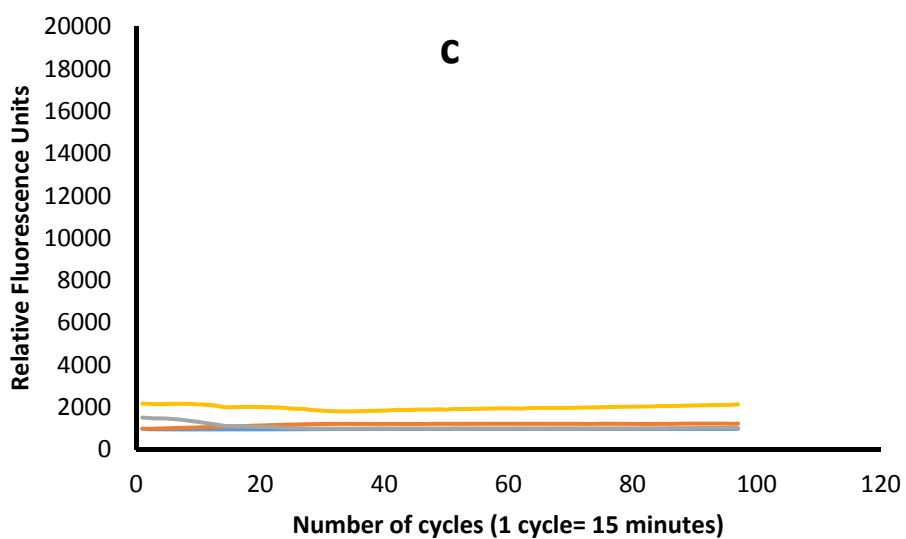



**Figure S7.** Readings from wells containing *S. marcescens* ATCC 43861 in the presence of no substrate (blue line), substrate **8a** (grey line), substrate **8b** (yellow line) or substrate **9** (orange line), respectively; **a**) absorbance at 660 nm; **b**) fluorescent signal intensities at 365 / 440 nm; **c**) fluorescent intensities at 375 / 445 nm.

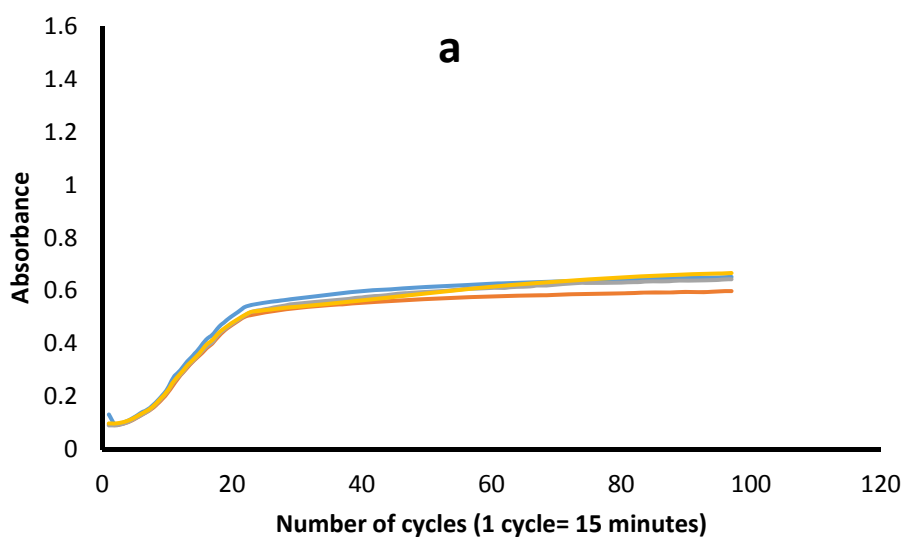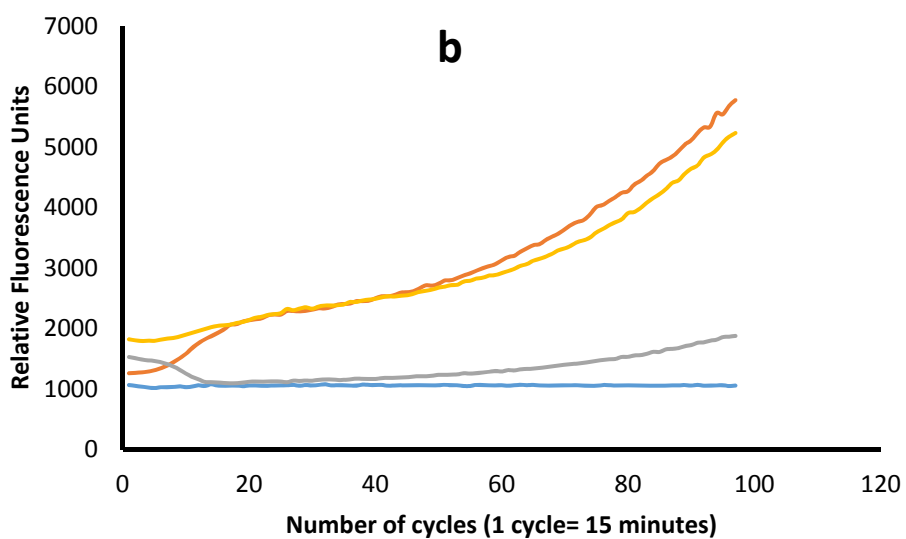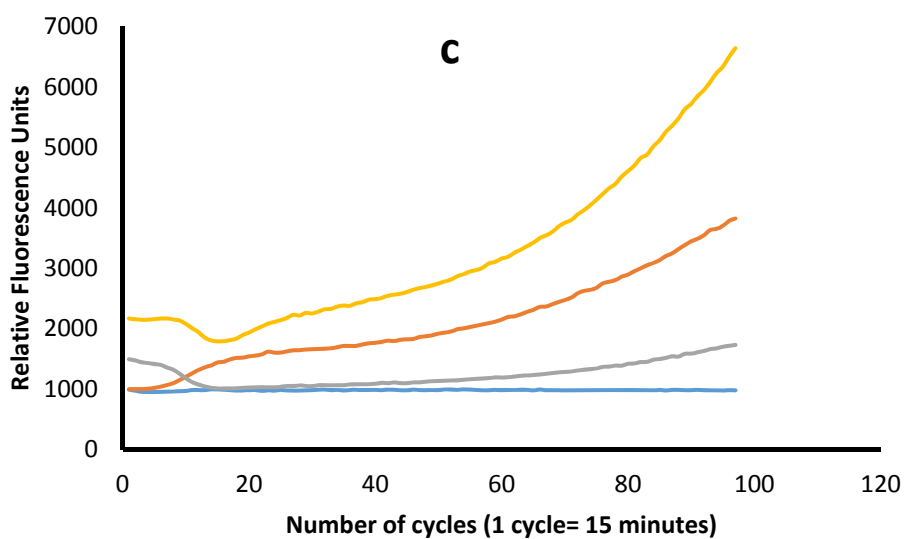

**Figure S8.** Readings from wells containing *P. aeruginosa* API 10 11 314 in the presence of no substrate (blue line), substrate **8a** (grey line), substrate **8b** (yellow line) or substrate **9** (orange line), respectively: **a**) absorbance at 660 nm; **b**) fluorescent signal intensities at 365 / 440 nm; **c**) fluorescent intensities at 375 / 445 nm.

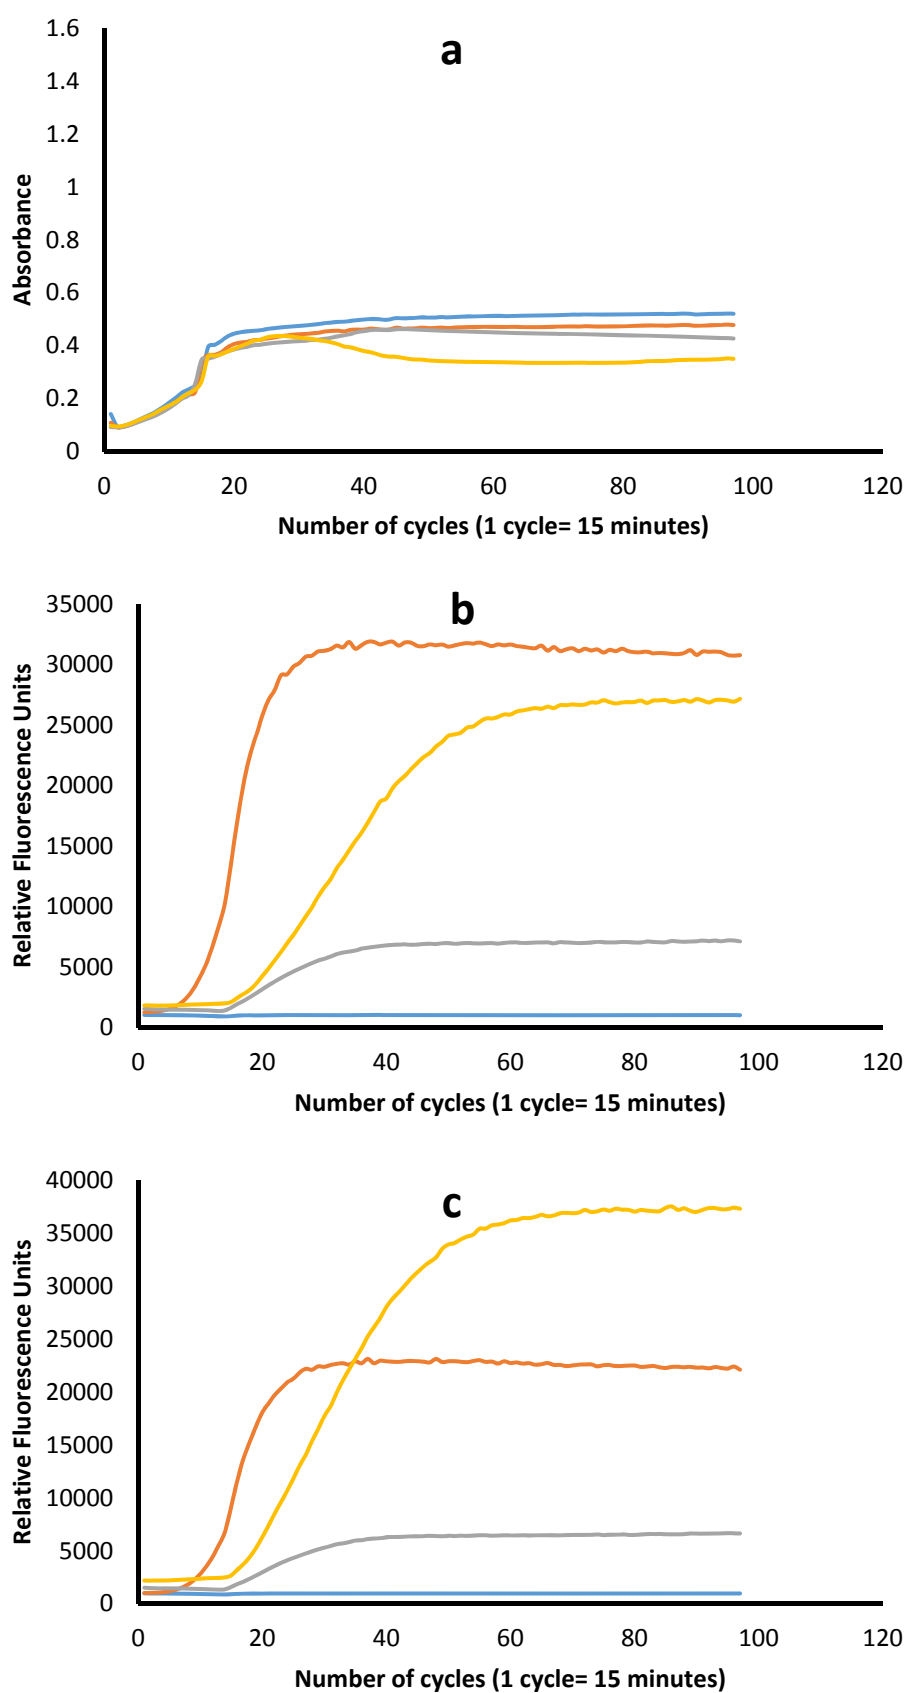

**Figure S9.** Readings from wells containing *P. aeruginosa* ATCC 27853 in the presence of no substrate (blue line), substrate **8a** (grey line), substrate **8b** (yellow line) or substrate **9** (orange line), respectively; **a**) absorbance at 660 nm; **b**) fluorescent signal intensities at 365 / 440 nm; **c**) fluorescent intensities at 375 / 445 nm.

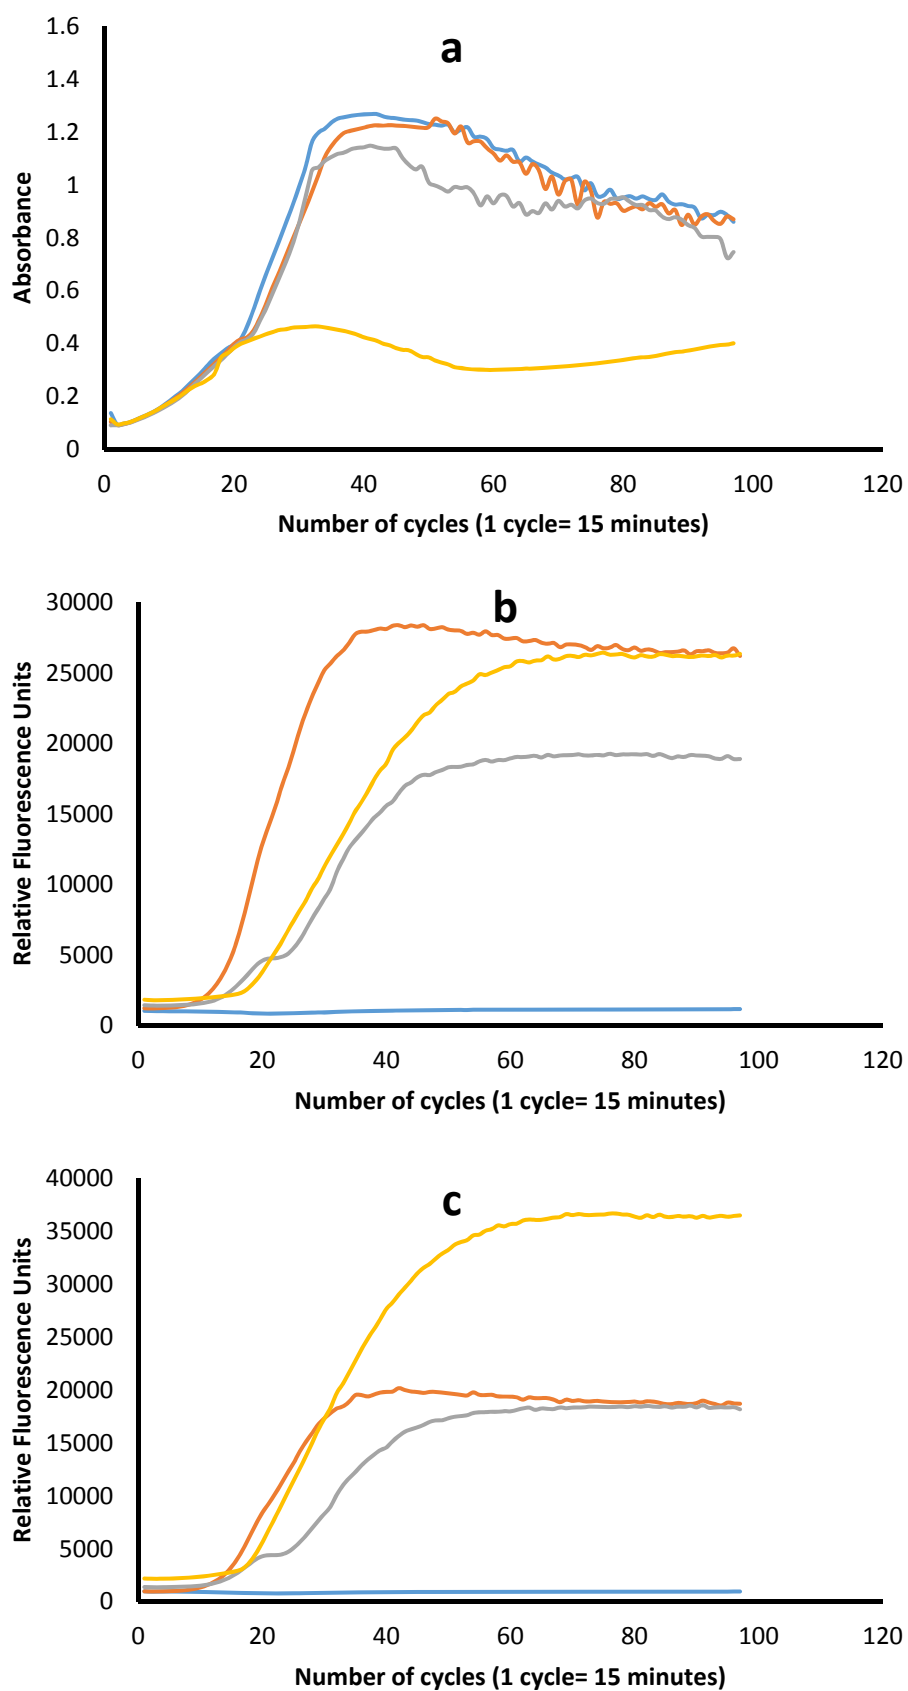

**Figure S10.** Readings from wells containing *P. aeruginosa* ATCC 10145 in the presence of no substrate (blue line), substrate **8a** (grey line), substrate **8b** (yellow line) or substrate **9** (orange line), respectively; **a**) absorbance at 660 nm; **b**) fluorescent signal intensities at 365 / 440 nm; **c**) fluorescent intensities at 375 / 445 nm.

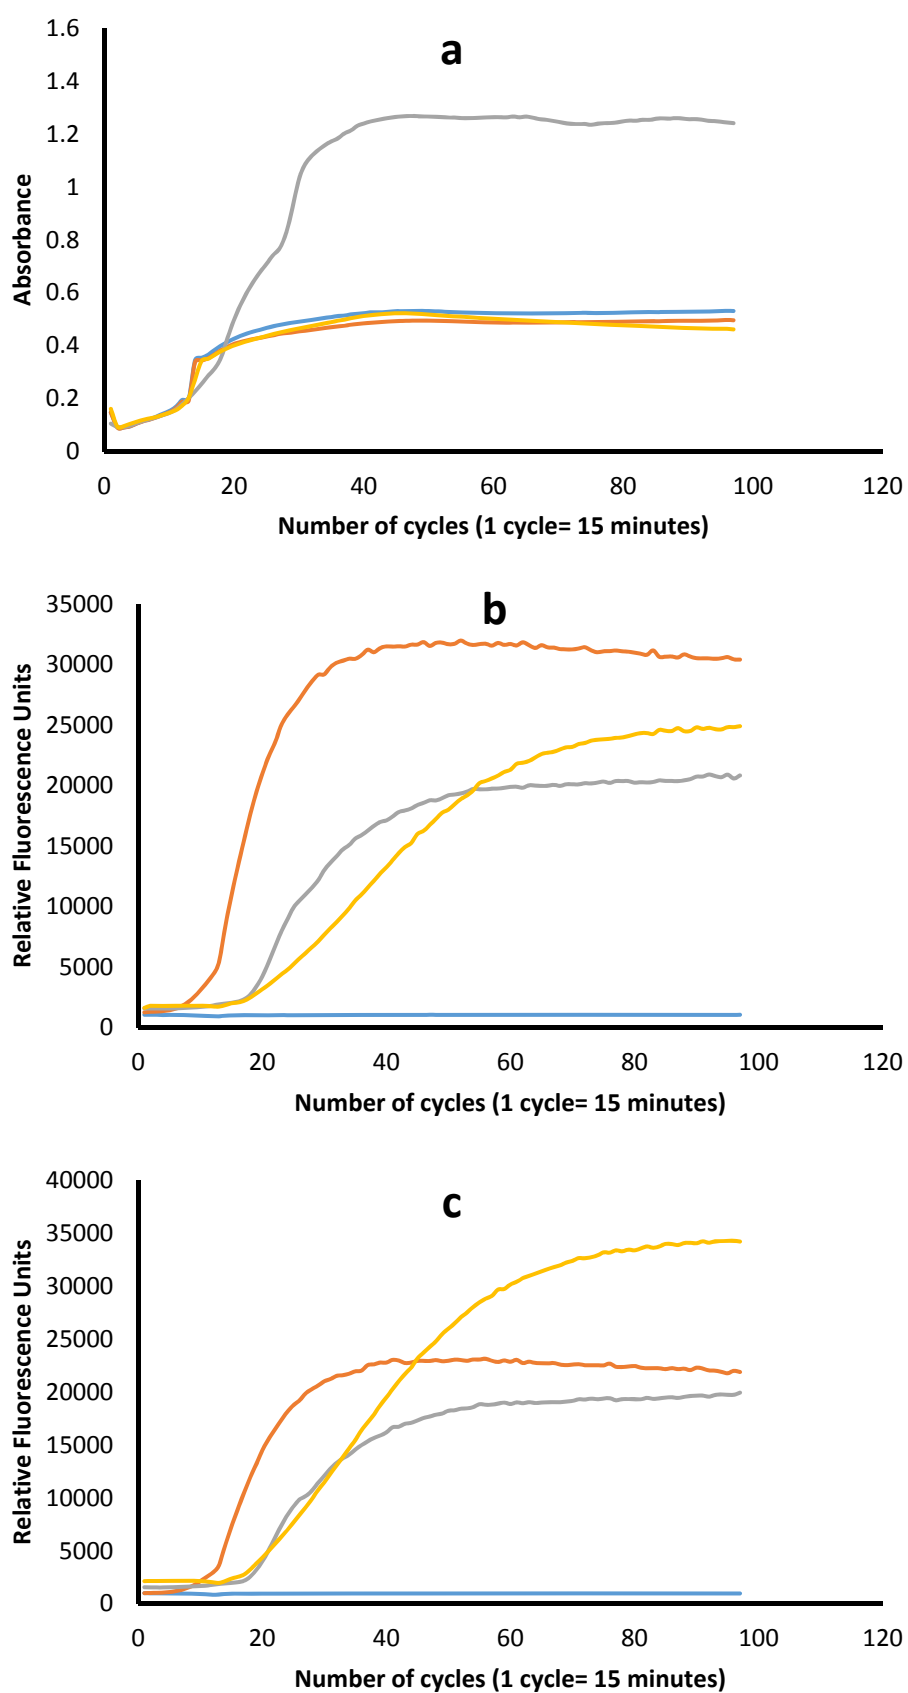

**Figure S11.** Readings from wells containing *S. marcescens* API 92 11 027 in the presence of no substrate (blue line), substrate **8a** (grey line), substrate **8b** (yellow line) or substrate **9** (orange line), respectively; **a**) absorbance at 660 nm; **b**) fluorescent signal intensities at 365 / 440 nm; **c**) fluorescent intensities at 375 / 445 nm.

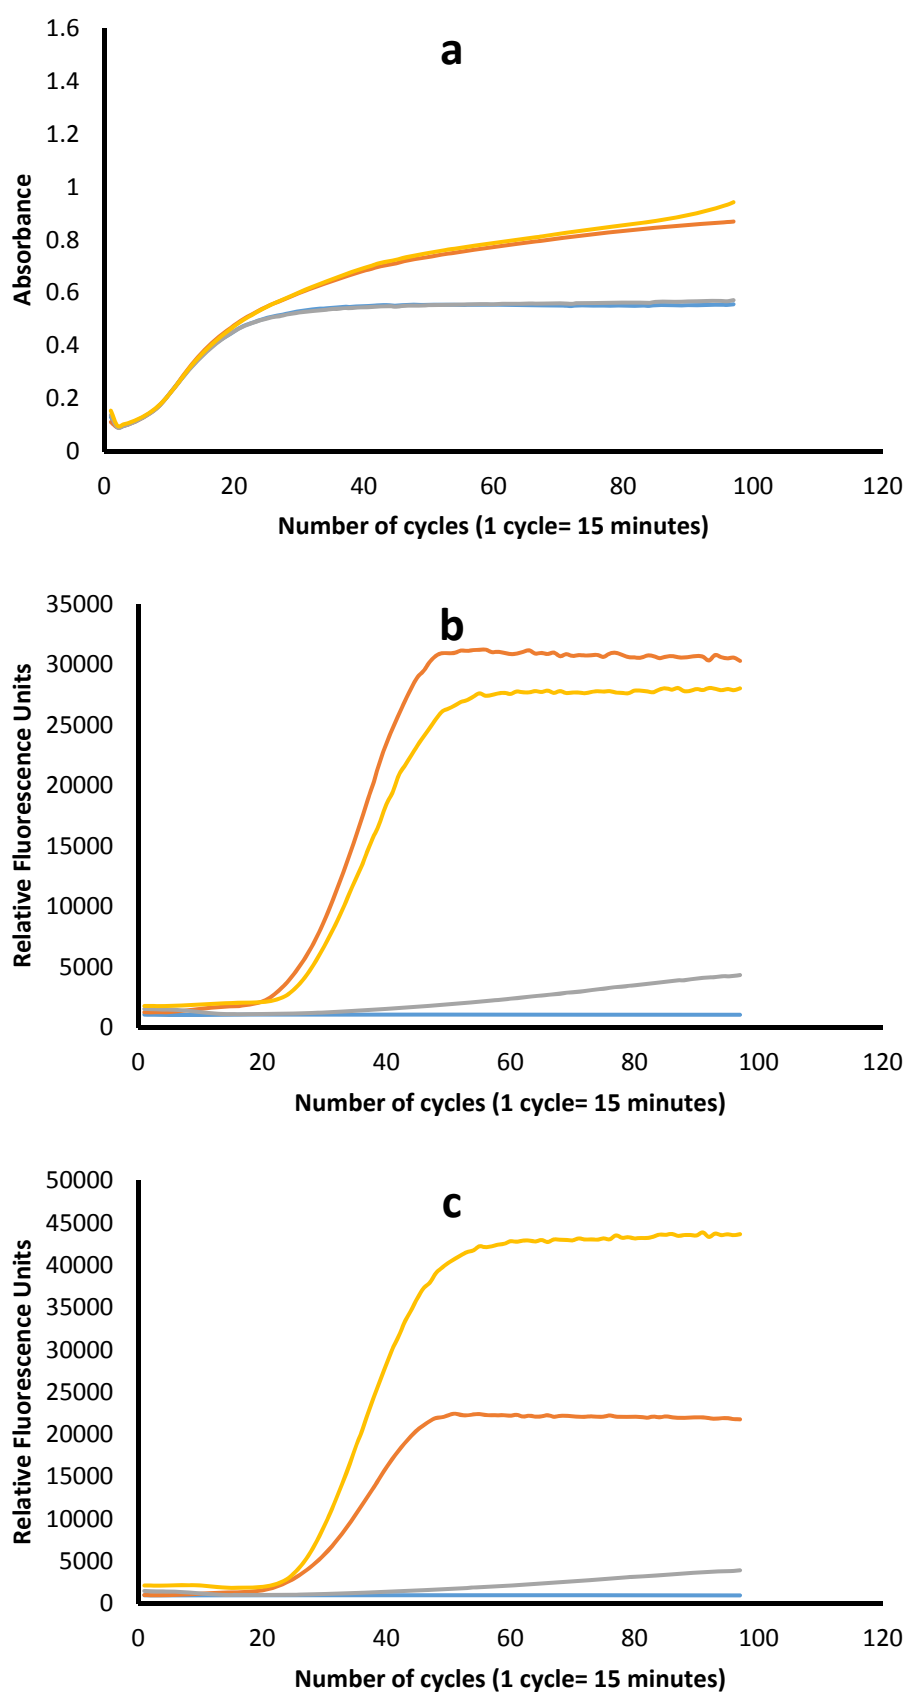

**Figure S12.** Readings from wells containing *P. aeruginosa* API 08 04 064 in the presence of no substrate (blue line), substrate **8a** (grey line), substrate **8b** (yellow line) or substrate **9** (orange line), respectively; **a**) absorbance at 660 nm; **b**) fluorescent signal intensities at 365 / 440 nm; **c**) fluorescent intensities at 375 / 445 nm.

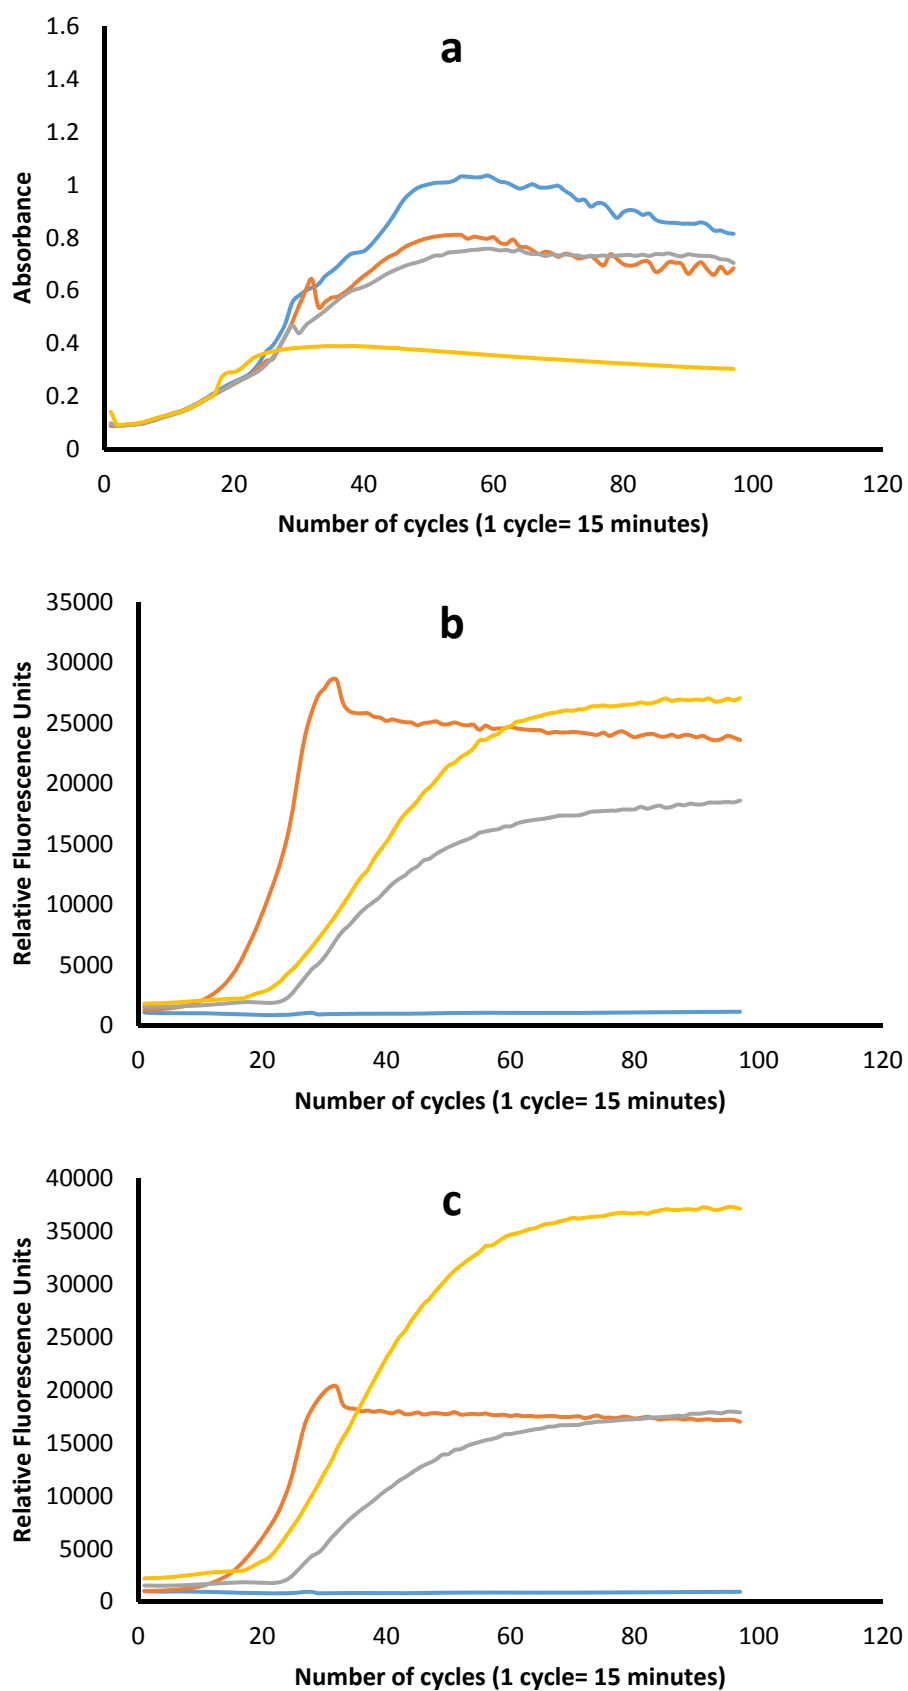

**Figure S13.** Readings from wells containing *P. aeruginosa* API 14 02 100 in the presence of no substrate (blue line), substrate **8a** (grey line), substrate **8b** (yellow line) or substrate **9** (orange line), respectively; **a**) absorbance at 660 nm; **b**) fluorescent signal intensities at 365 / 440 nm; **c**) fluorescent intensities at 375 / 445 nm.

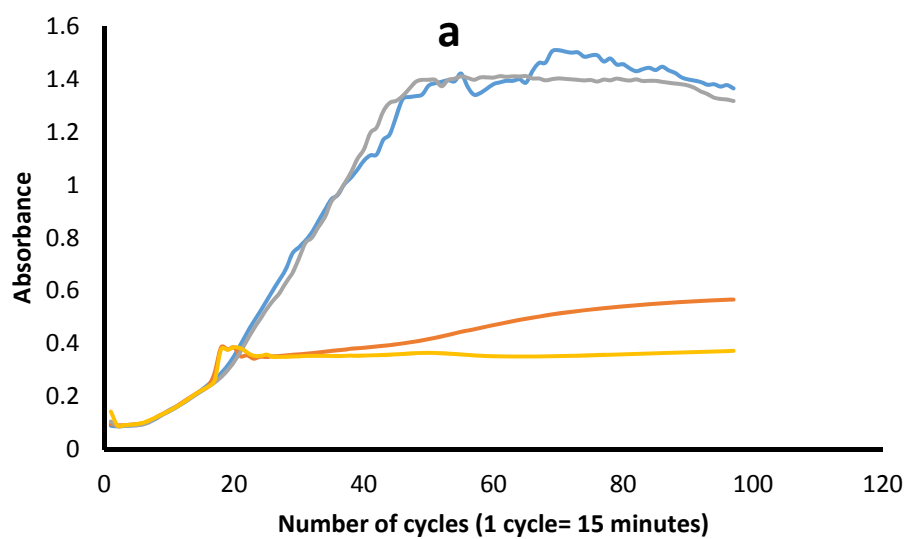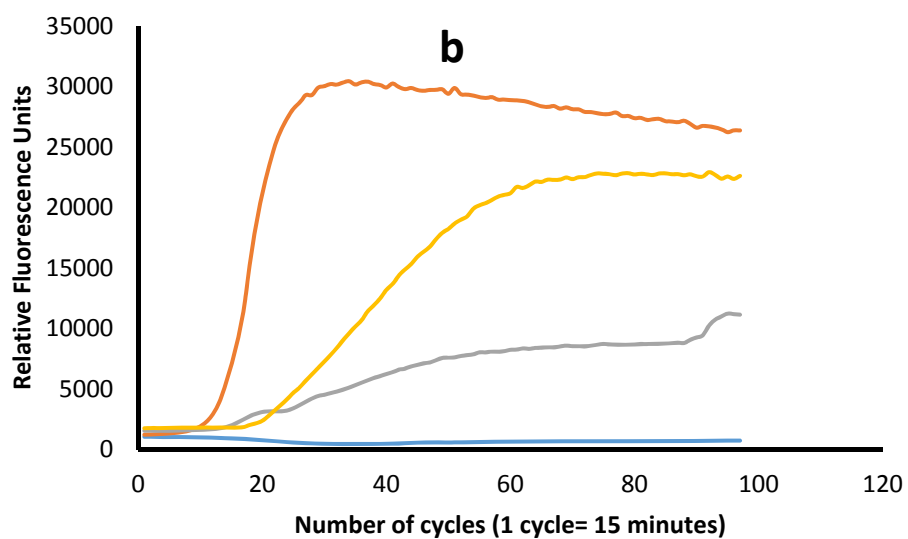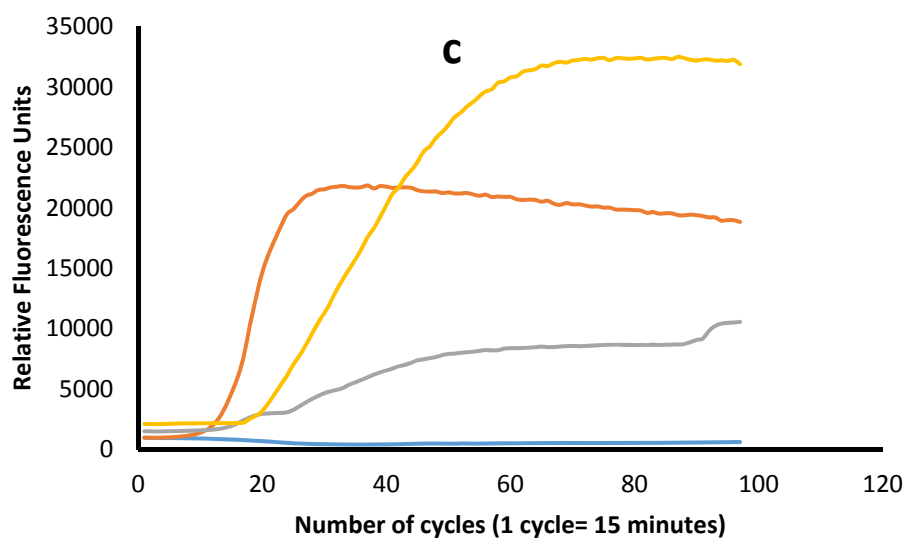

**Figure S14.** Readings from wells containing *P. aeruginosa* API 14 02 103 in the presence of no substrate (blue line), substrate **8a** (grey line), substrate **8b** (yellow line) or substrate **9** (orange line), respectively; **a**) absorbance at 660 nm; **b**) fluorescent signal intensities at 365 / 440 nm; **c**) fluorescent intensities at 375 / 445 nm.

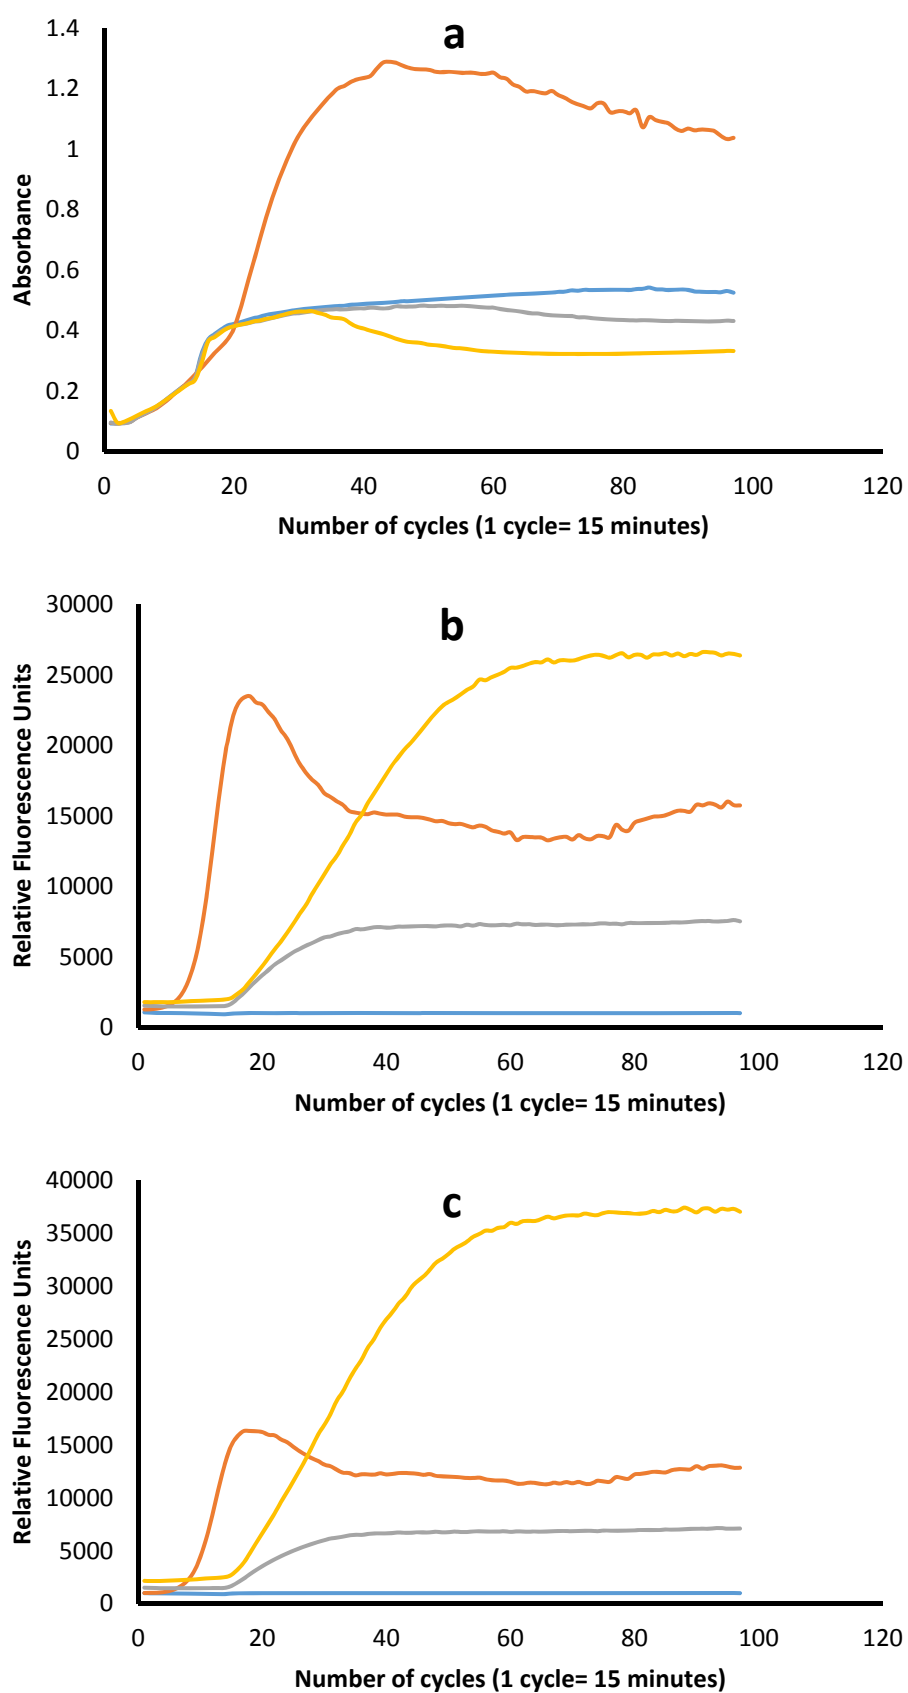



# NMR Spectra

## 4-(Boc-β-Alanyl-amino)benzyl alcohol <sup>1</sup>H NMR

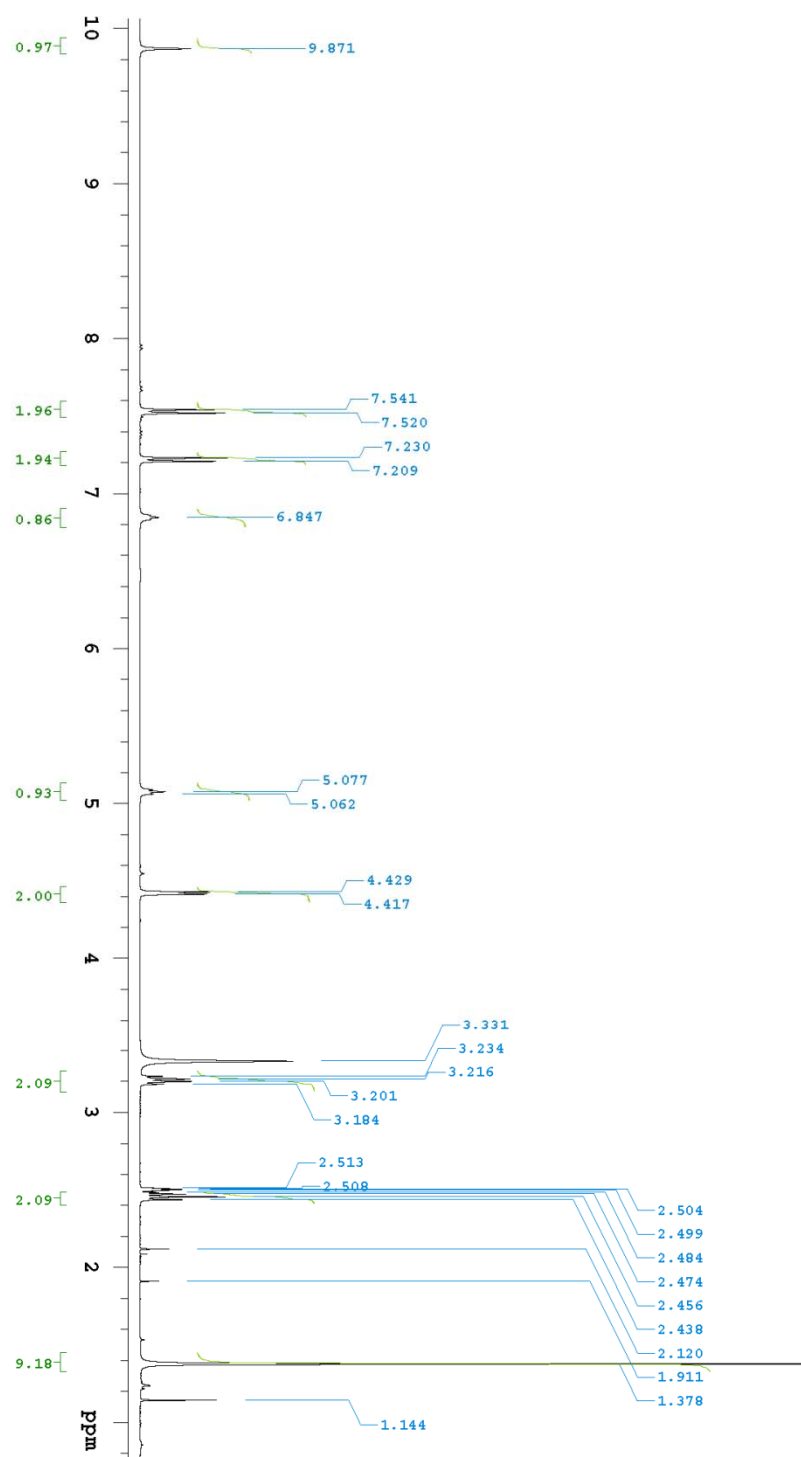

# 4-(Boc-β-Alanyl)benzyl alcohol <sup>13</sup>C NMR

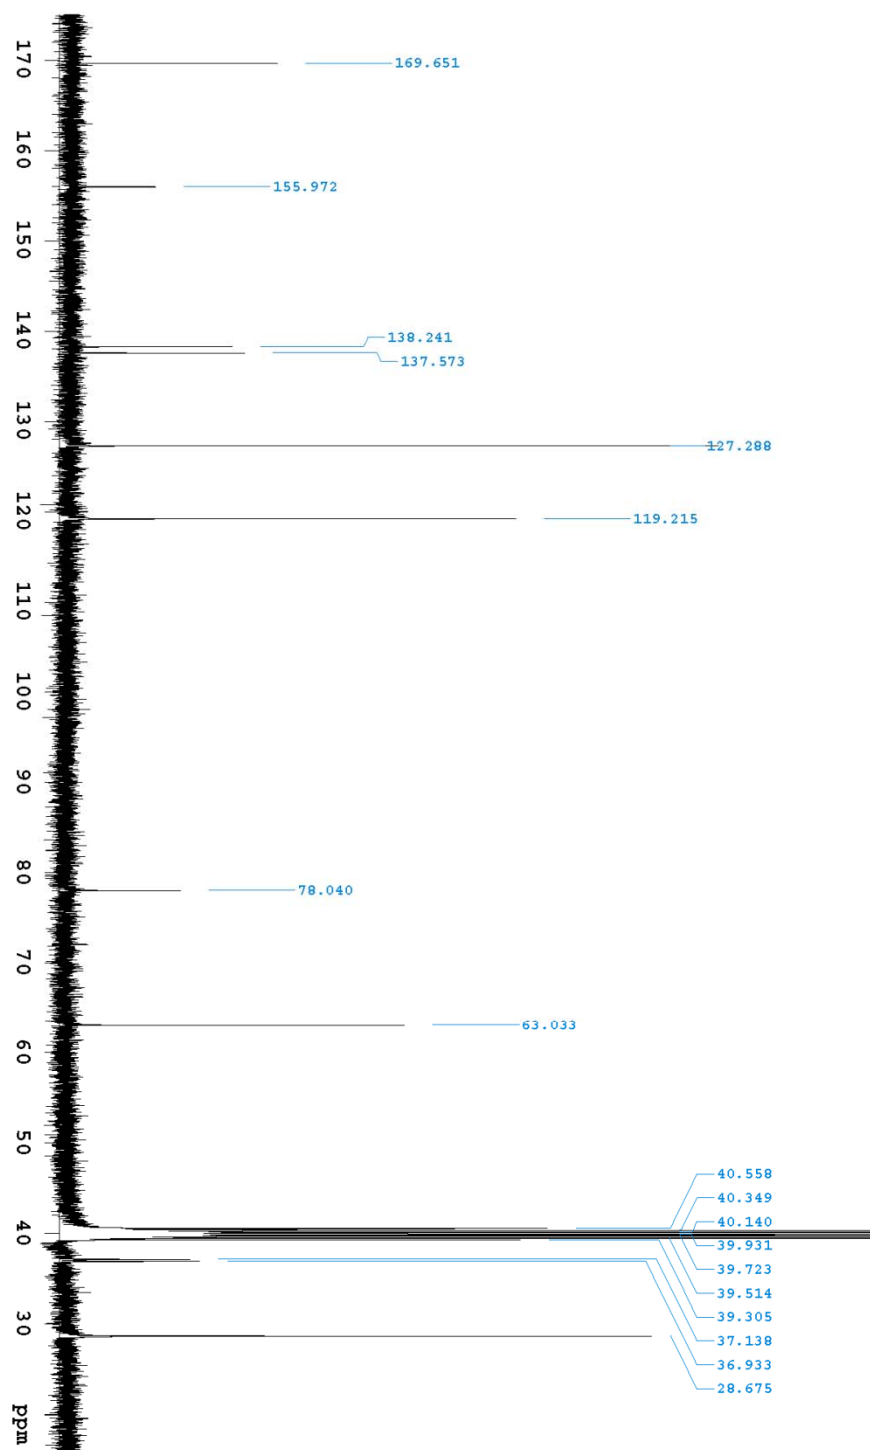

7-{4-(Boc-β-Alanyl-amino)}benzyloxy-4-methylcoumarin 7a <sup>1</sup>H NMR

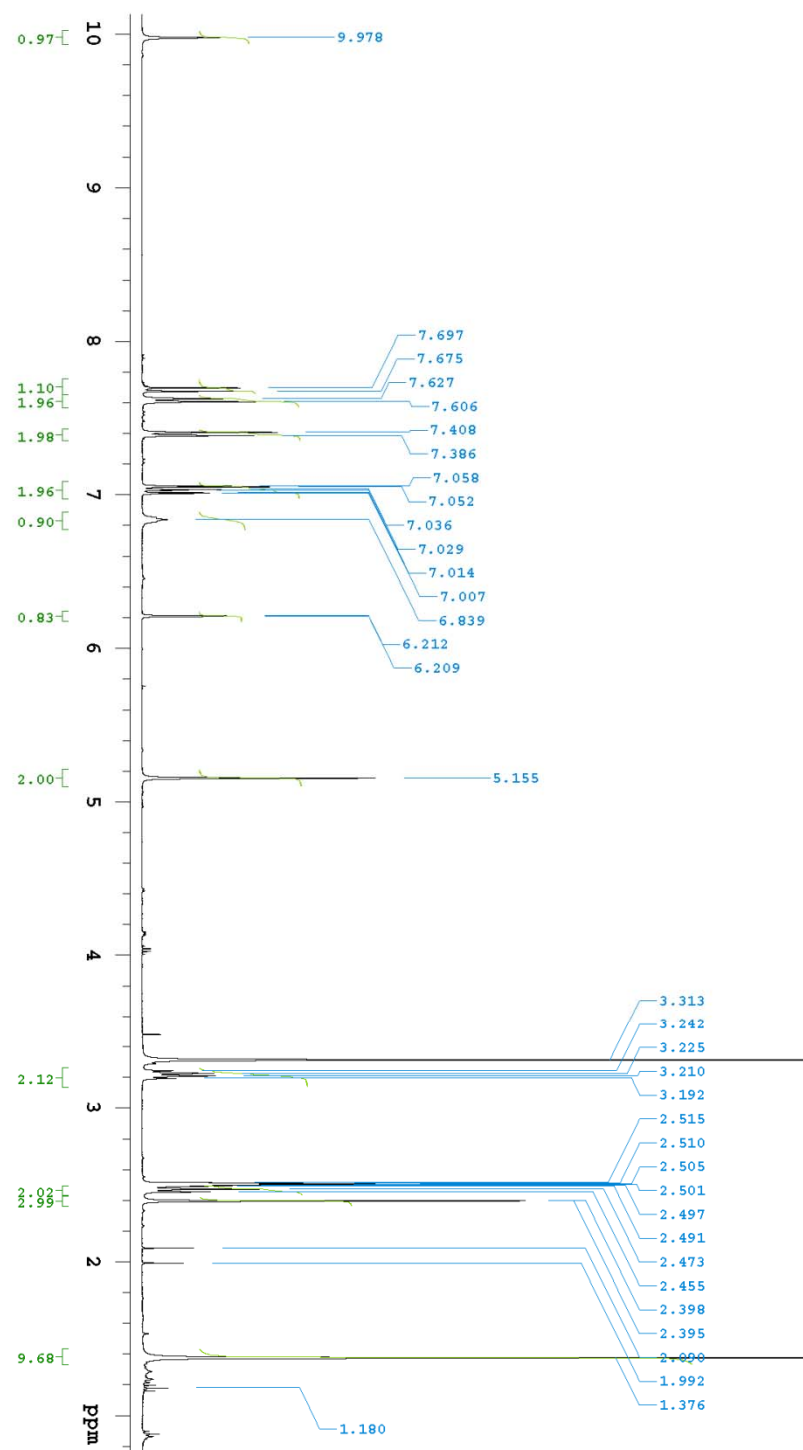

7-{4-(Boc-β-Alanyl)amino}benzyloxy-4-methylcoumarin 7a <sup>13</sup>C NMR

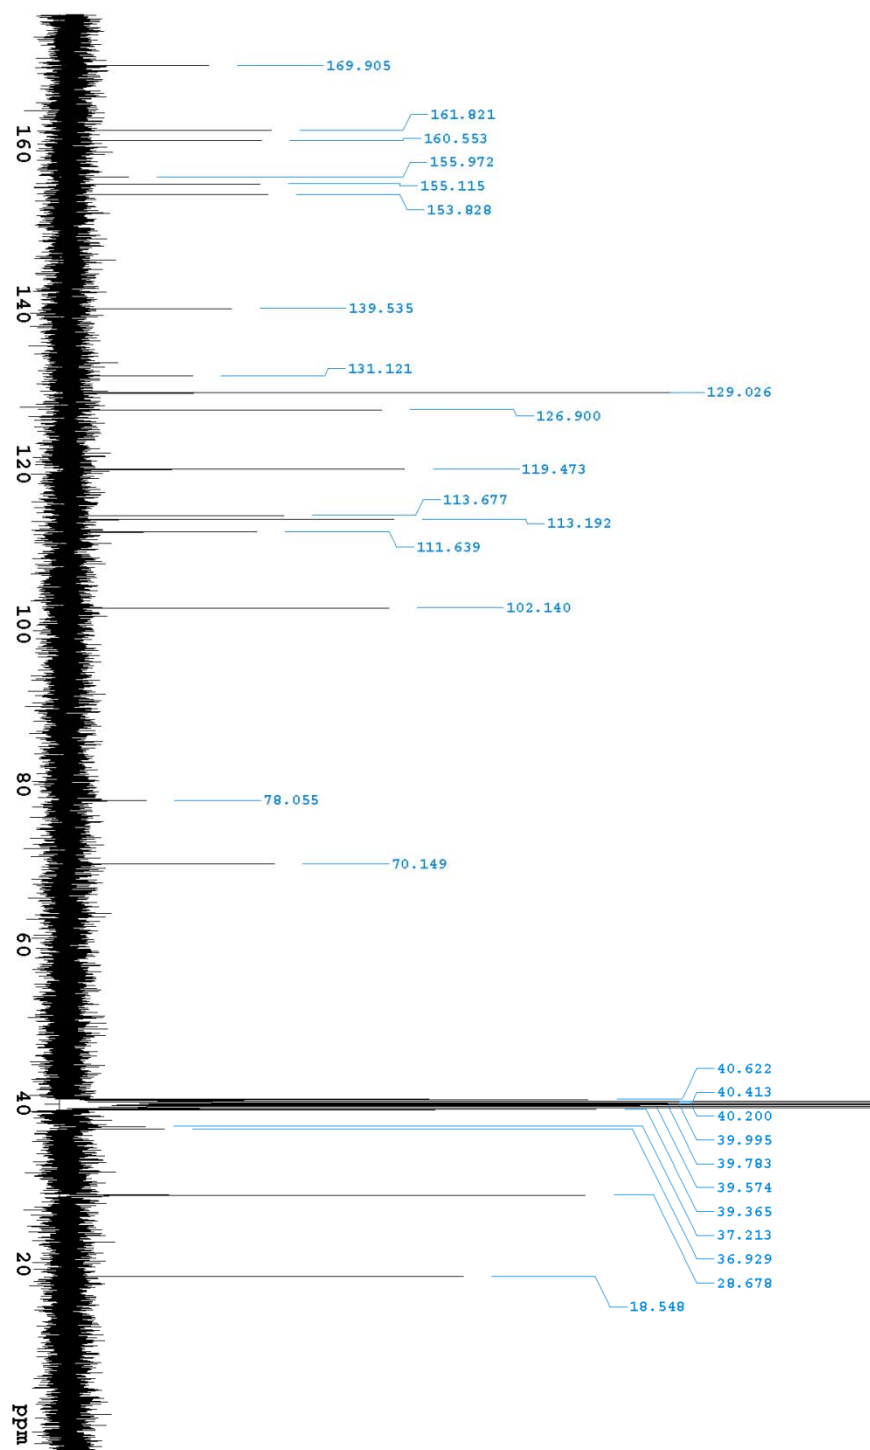

7-{4-(Boc-β-Alanyl-amino)}benzyloxy-3-ethoxycarbonylcoumarin 7b <sup>1</sup>H NMR

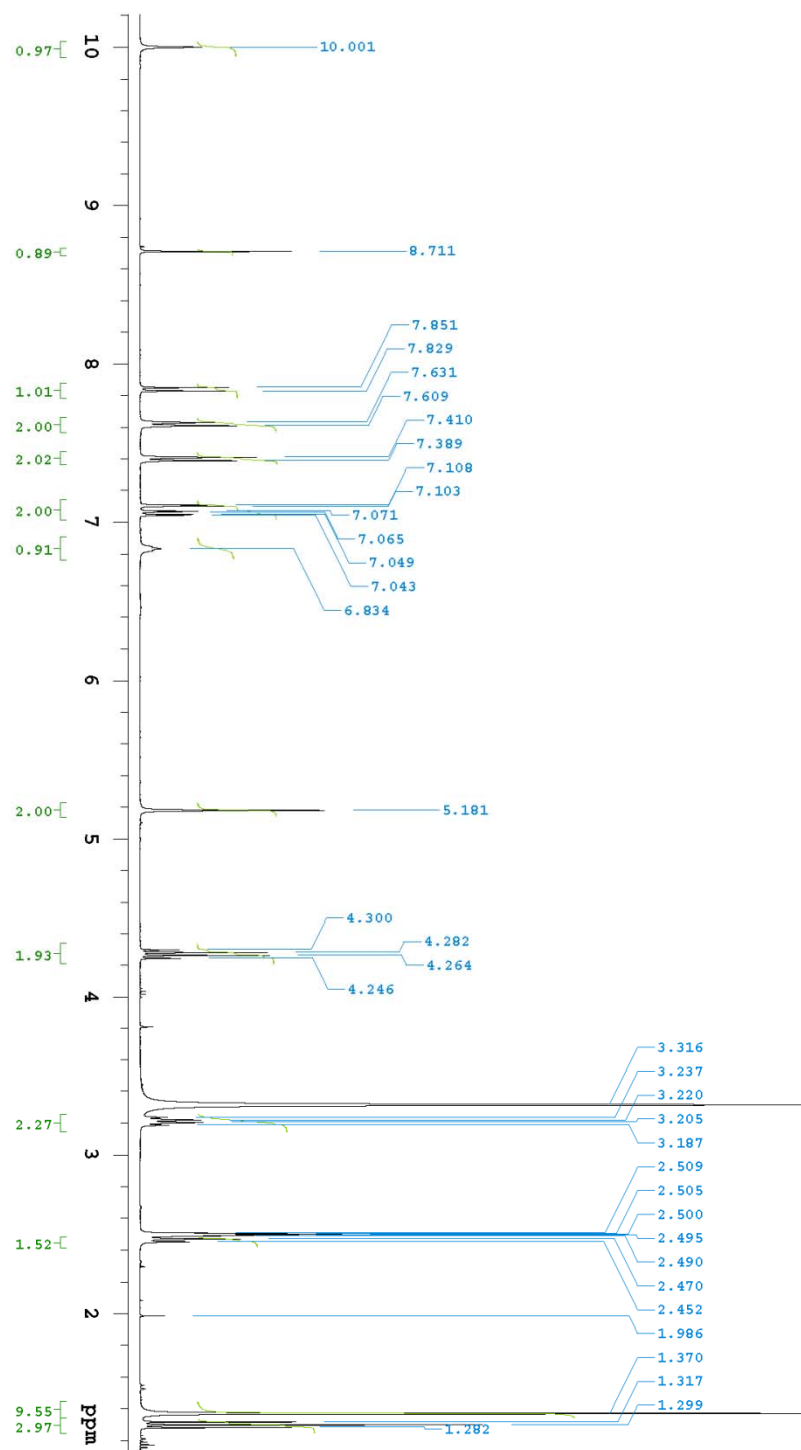

7-{4-(Boc-β-Alanyl-amino)}benzyloxy-3-ethoxycarbonylcoumarin 7b <sup>13</sup>C NMR

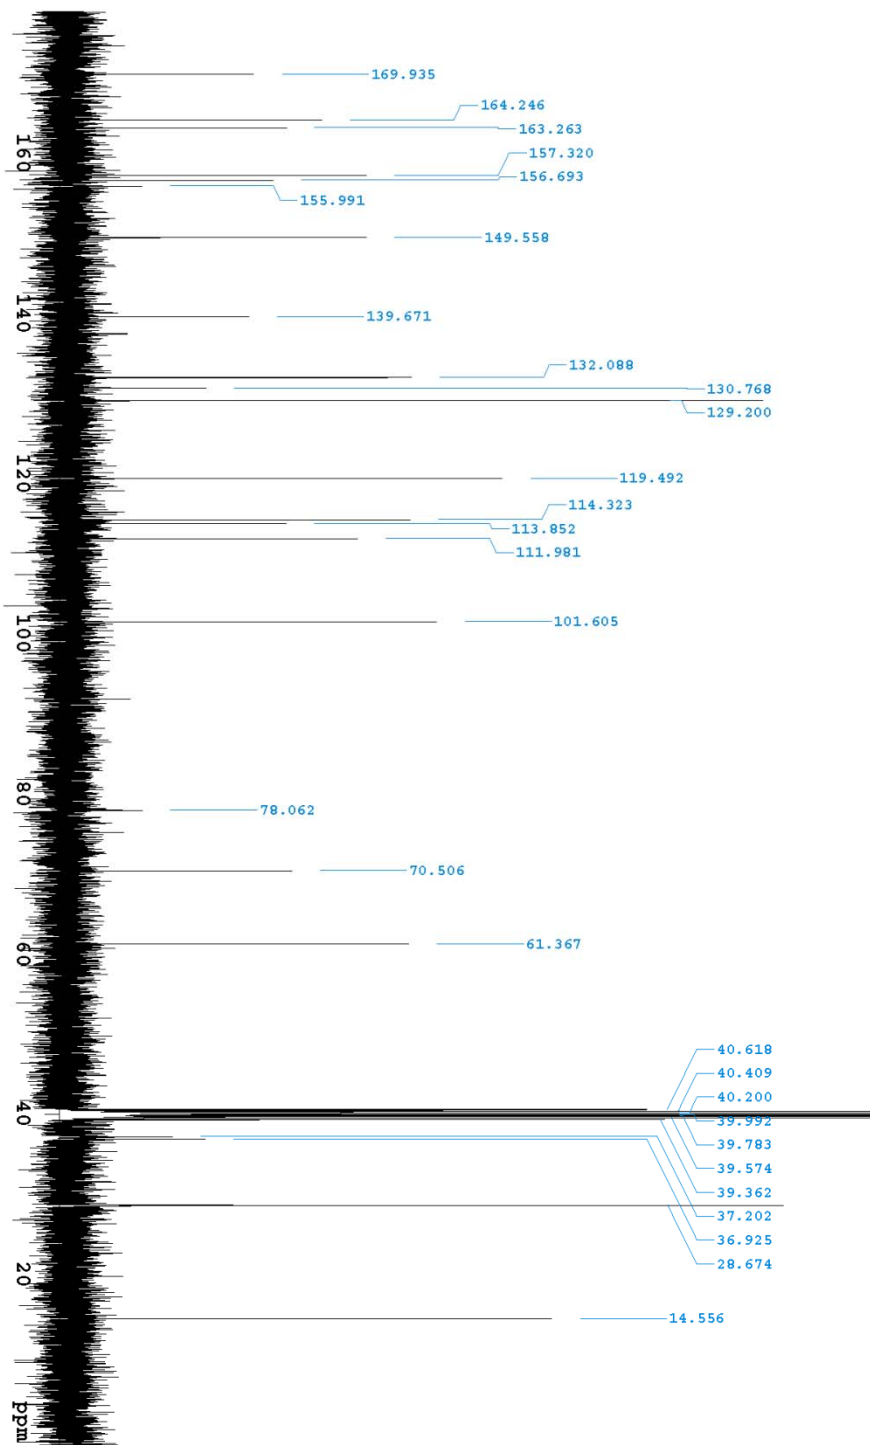

7-{4-( $\beta$ -Alanylamino)}benzyloxy-4-methylcoumarin trifluoroacetate 8a  $^1\text{H}$  NMR

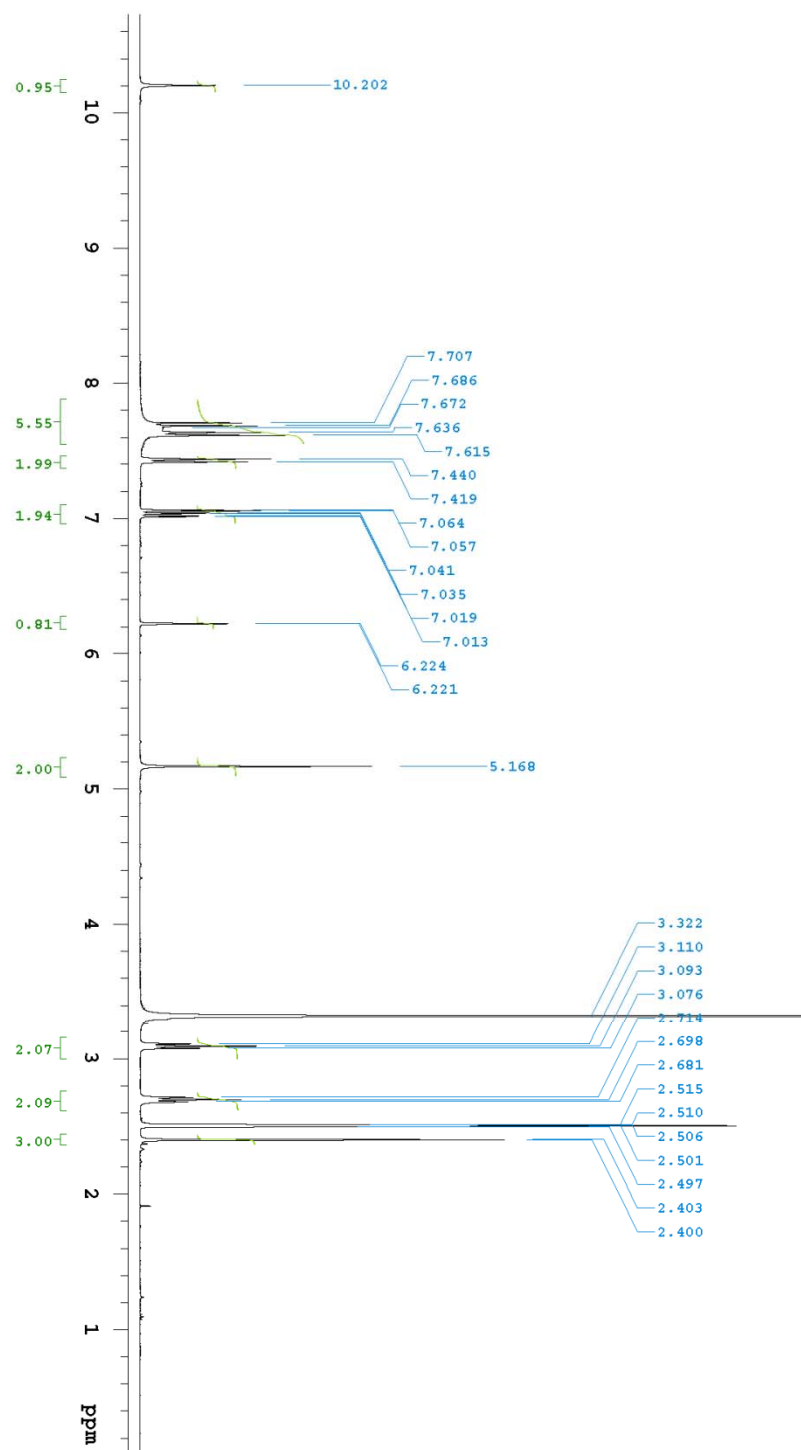

7-{4-(β-Alanyl-amino)}benzyloxy-4-methylcoumarin trifluoroacetate 8a <sup>13</sup>C NMR

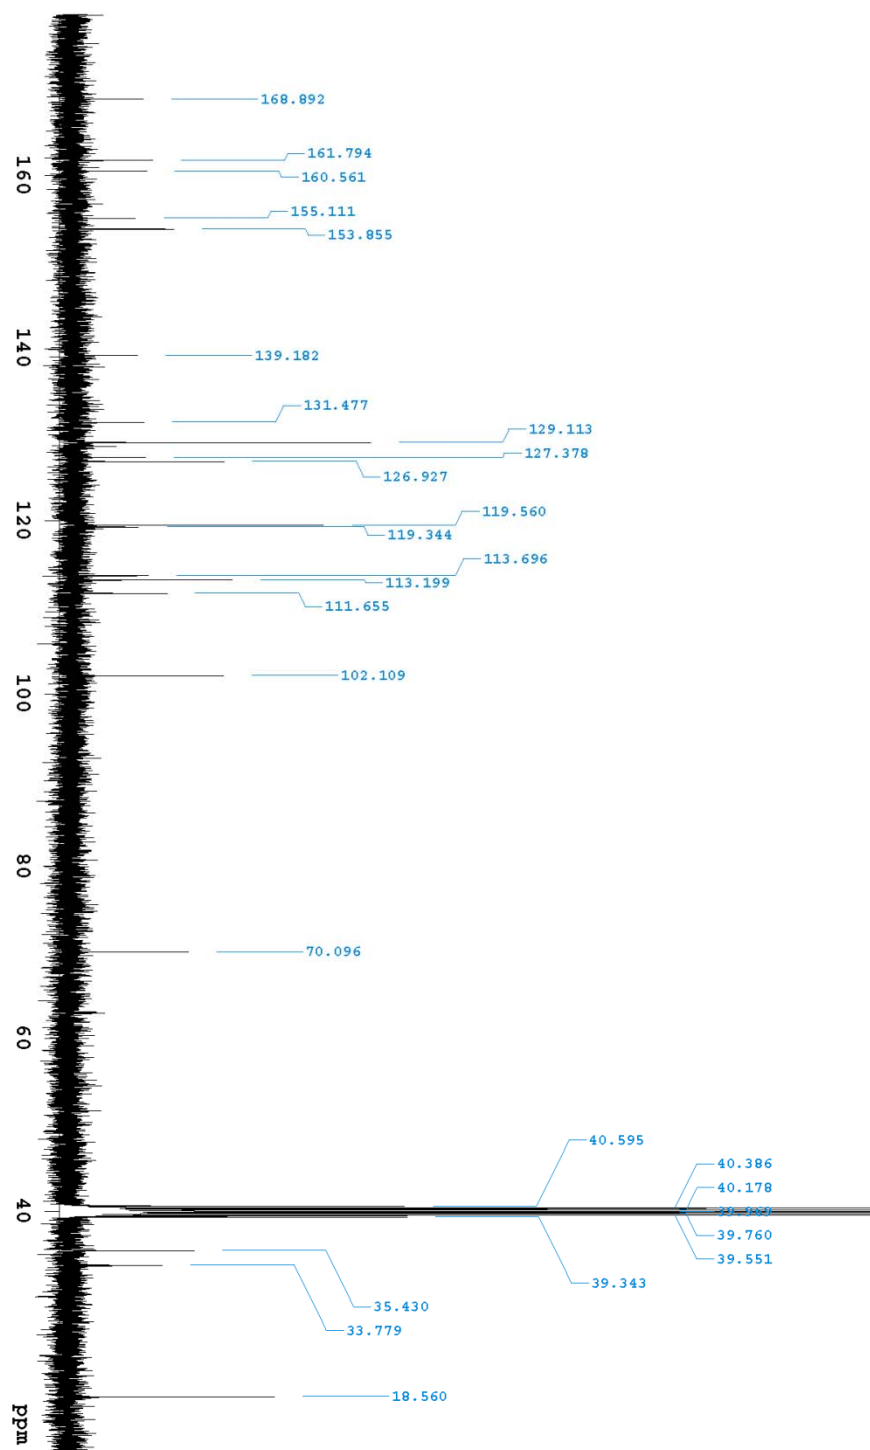



7-{4-(β-Alanylamino)}benzyloxy-3-ethoxycarbonylcoumarin trifluoroacetate 8b <sup>1</sup>H NMR

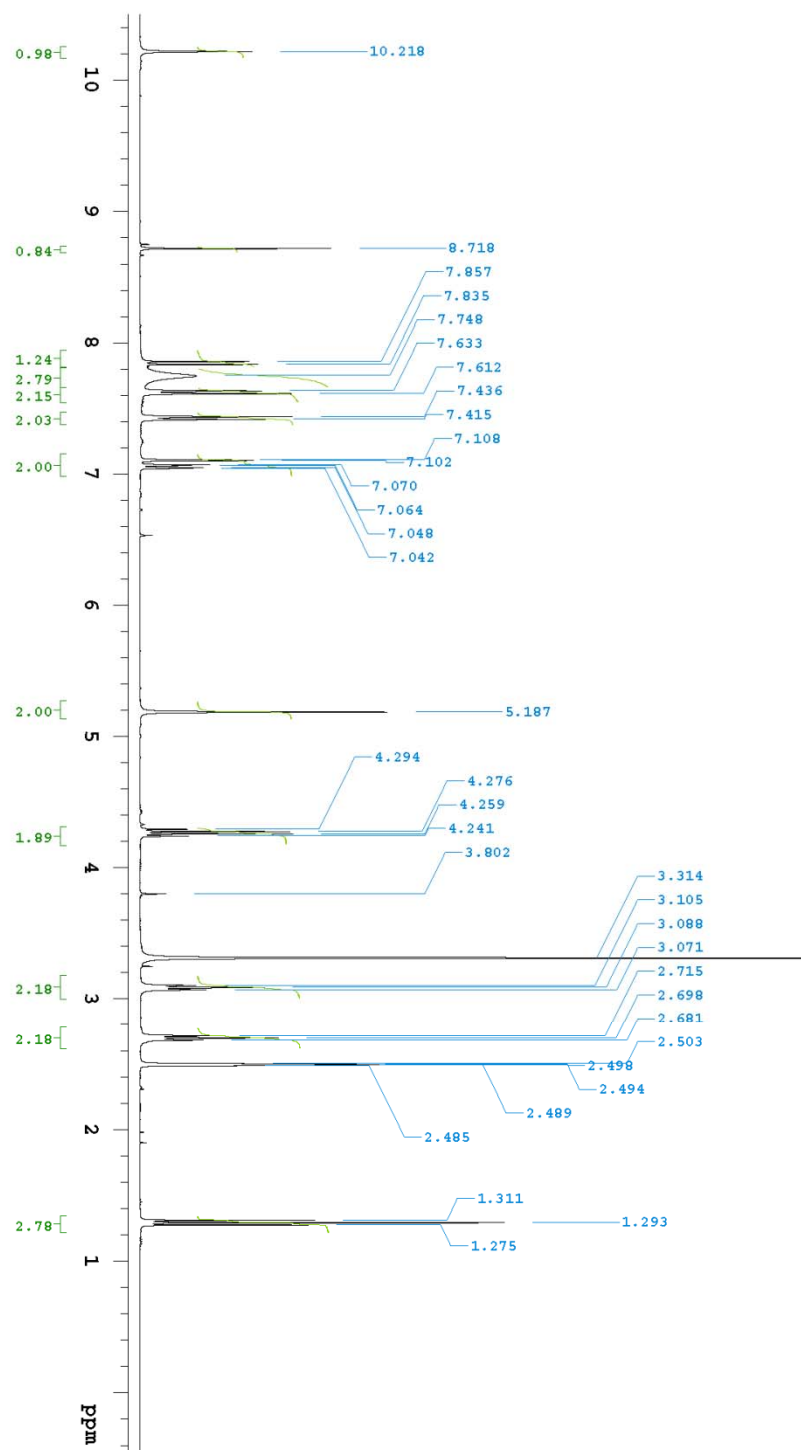

7-{4-(β-Alanylamino)}benzyloxy-3-ethoxycarbonylcoumarin trifluoroacetate 8b <sup>13</sup>C NMR

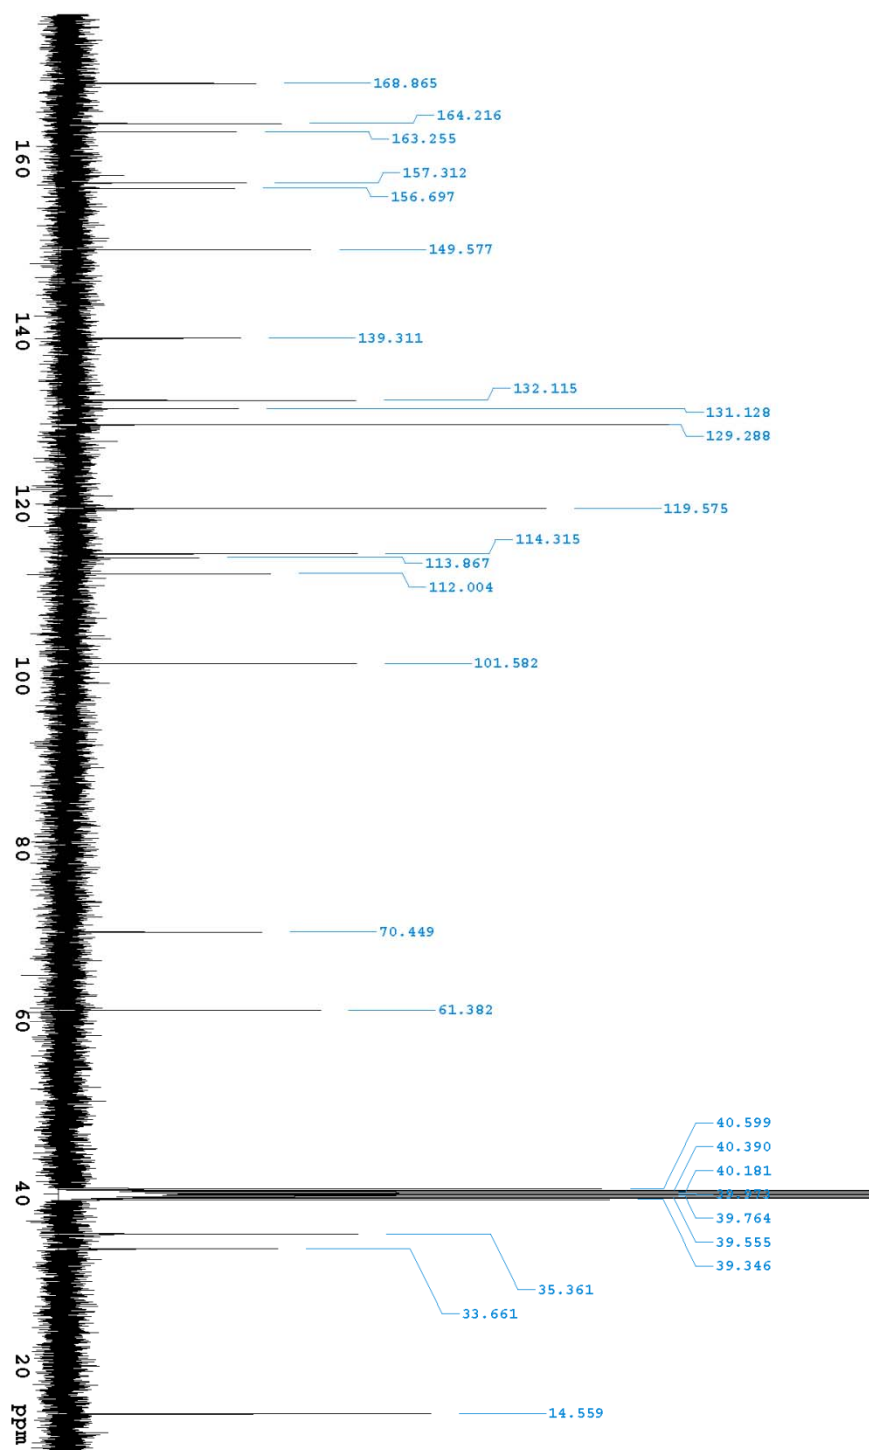

Supplement: c6ra12875k1.pdf [file c6ra12875k1.pdf]
